# Supplementary material for: Analysis of M⋯H–Si interactions in [{M(CpSiMe2H)Cl3}2], (M = Zr, Hf, Ti and Mo) complexes
Source: Royal Society of Chemistry journal article supplement (doi:10.1039/c1dt10630a), 2011-01-01
Supplement: c1dt10630a.pdf [file c1dt10630a.pdf]

## Supplementary Information

### Geometries:

#### Free ligand equilibrium geometry

|    |           |           |           |
|----|-----------|-----------|-----------|
| Si | 0.672613  | -1.489877 | 0.466843  |
| C  | 0.681669  | -1.538210 | 2.349607  |
| C  | 2.439120  | -1.537420 | -0.185177 |
| H  | -0.070932 | -2.674139 | -0.050330 |
| C  | -0.230425 | 0.041445  | -0.158394 |
| H  | 2.456680  | -1.541345 | -1.286527 |
| H  | 3.013555  | -0.659989 | 0.154792  |
| H  | 2.966639  | -2.439332 | 0.166301  |
| H  | -0.343542 | -1.549982 | 2.752209  |
| H  | 1.202382  | -2.436525 | 2.719860  |
| H  | 1.195117  | -0.657470 | 2.769323  |
| C  | -1.367603 | -0.066526 | -0.981652 |
| C  | -2.038463 | 1.068963  | -1.448741 |
| C  | -1.583197 | 2.343140  | -1.099797 |
| C  | -0.455620 | 2.475956  | -0.282742 |
| C  | 0.209423  | 1.337453  | 0.179989  |
| H  | -1.737149 | -1.056514 | -1.263412 |
| H  | -2.918778 | 0.957546  | -2.086359 |
| H  | -2.105119 | 3.231552  | -1.462853 |
| H  | -0.094095 | 3.469133  | -0.005609 |
| H  | 1.089237  | 1.466540  | 0.818236  |

#### Free ligand with geometry as in complex

|    |           |           |           |
|----|-----------|-----------|-----------|
| Si | -0.604755 | -1.588928 | 0.000000  |
| C  | 0.042988  | -2.446852 | 1.545128  |
| C  | 0.042988  | -2.446852 | -1.545128 |
| H  | -2.094214 | -1.693599 | 0.000000  |
| C  | -0.127856 | 0.238094  | 0.000000  |
| H  | -0.370432 | -2.005109 | -2.465648 |
| H  | 1.141885  | -2.387127 | -1.604631 |
| H  | -0.238330 | -3.512210 | -1.535404 |
| H  | -0.370432 | -2.005109 | 2.465648  |
| H  | -0.238330 | -3.512210 | 1.535404  |
| H  | 1.141885  | -2.387127 | 1.604631  |
| C  | 0.042988  | 0.949923  | -1.203957 |
| C  | 0.368138  | 2.309797  | -1.208171 |
| C  | 0.531702  | 2.993814  | 0.000000  |
| C  | 0.368138  | 2.309797  | 1.208171  |
| C  | 0.042988  | 0.949923  | 1.203957  |
| H  | -0.077565 | 0.436415  | -2.161887 |
| H  | 0.495146  | 2.836255  | -2.157435 |
| H  | 0.786918  | 4.056268  | 0.000000  |
| H  | 0.495146  | 2.836255  | 2.157435  |
| H  | -0.077565 | 0.436415  | 2.161887  |

#### Ti complex equilibrium geometry (singlet state)

|    |          |           |           |
|----|----------|-----------|-----------|
| XX | 3.334281 | 0.972889  | -0.464990 |
| H  | 2.364759 | -2.260909 | 2.263601  |

|    |           |           |           |
|----|-----------|-----------|-----------|
| H  | -4.451426 | 2.462169  | 2.186473  |
| H  | -2.539376 | -0.107487 | 2.425059  |
| Cl | 1.437968  | 2.520962  | 2.140372  |
| H  | 3.806883  | 0.503208  | 1.722447  |
| H  | 4.146315  | -2.294121 | 2.110812  |
| H  | 3.187880  | -3.741823 | 1.725534  |
| C  | 3.201728  | -2.642006 | 1.661932  |
| Cl | -0.699534 | -3.362658 | 0.955771  |
| H  | -5.479153 | 2.411743  | 0.730961  |
| C  | -4.517063 | 2.769962  | 1.130956  |
| H  | -4.526902 | 3.872030  | 1.104293  |
| H  | -3.252343 | -2.664075 | 2.019907  |
| Cl | 0.250437  | -0.331363 | 1.445068  |
| H  | 4.006602  | 2.917313  | 0.559244  |
| C  | -2.929986 | -0.514838 | 1.495692  |
| C  | 3.599722  | 0.715784  | 0.676495  |
| C  | -3.307890 | -1.863379 | 1.288930  |
| C  | 3.709567  | 1.995678  | 0.066174  |
| H  | -1.804991 | 2.574295  | 0.754723  |
| C  | -3.124238 | 0.225245  | 0.282997  |
| Ti | 1.416250  | 1.473356  | 0.108659  |
| Si | 3.063912  | -2.111487 | -0.129208 |
| Si | -3.063912 | 2.111487  | 0.129208  |
| C  | 3.124238  | -0.225245 | -0.282997 |
| Ti | -1.416250 | -1.473356 | -0.108659 |
| H  | 1.804991  | -2.574295 | -0.754723 |
| C  | -3.709567 | -1.995678 | -0.066174 |
| C  | 3.307890  | 1.863379  | -1.288930 |
| H  | -4.006602 | -2.917313 | -0.559244 |
| C  | -3.599722 | -0.715784 | -0.676495 |
| H  | 5.479153  | -2.411743 | -0.730961 |
| H  | 4.526902  | -3.872030 | -1.104293 |
| C  | 2.929986  | 0.514838  | -1.495692 |
| H  | 3.252343  | 2.664075  | -2.019907 |
| C  | 4.517063  | -2.769962 | -1.130956 |
| Cl | 0.699534  | 3.362658  | -0.955771 |
| H  | -3.187880 | 3.741823  | -1.725534 |
| C  | -3.201728 | 2.642006  | -1.661932 |
| H  | -4.146315 | 2.294121  | -2.110812 |
| Cl | -0.250437 | 0.331363  | -1.445068 |
| H  | -3.806883 | -0.503208 | -1.722447 |
| Cl | -1.437968 | -2.520962 | -2.140372 |
| H  | 2.539376  | 0.107487  | -2.425059 |
| H  | 4.451426  | -2.462169 | -2.186473 |
| H  | -2.364759 | 2.260909  | -2.263601 |

Zr complex equilibrium geometry (singlet state)

|    |           |           |           |
|----|-----------|-----------|-----------|
| XX | 2.939361  | 1.938019  | -0.045426 |
| H  | -0.044130 | -3.616484 | -2.507491 |
| H  | -0.074737 | 3.681386  | -2.410358 |
| H  | 2.238859  | 2.210275  | -2.207357 |

|    |           |           |           |
|----|-----------|-----------|-----------|
| Cl | -3.172441 | 1.401057  | -1.693193 |
| H  | -2.344244 | -2.152646 | -2.154243 |
| H  | -0.744217 | -5.043563 | -1.692989 |
| H  | 1.017988  | -4.758819 | -1.661489 |
| C  | 0.033722  | -4.266670 | -1.622808 |
| Cl | 3.086064  | -1.353824 | -1.880854 |
| H  | 0.664788  | 5.086932  | -1.593270 |
| C  | -0.109349 | 4.307964  | -1.506108 |
| H  | -1.094020 | 4.800335  | -1.484205 |
| H  | 4.611762  | 1.214066  | -1.446843 |
| Cl | -0.039480 | 0.021588  | -1.633573 |
| H  | -4.677020 | -1.178380 | -1.253995 |
| C  | 2.572546  | 2.093944  | -1.178530 |
| C  | -2.627788 | -2.063736 | -1.107791 |
| C  | 3.828095  | 1.567744  | -0.782328 |
| C  | -3.862405 | -1.548982 | -0.637667 |
| H  | -0.950566 | 2.245923  | 0.052657  |
| C  | 1.805971  | 2.415689  | -0.011729 |
| Zr | -2.090362 | 0.125404  | 0.052176  |
| Si | -0.132106 | -3.281947 | -0.040159 |
| Si | 0.132106  | 3.281947  | 0.040160  |
| C  | -1.805971 | -2.415689 | 0.011729  |
| Zr | 2.090362  | -0.125404 | -0.052177 |
| H  | 0.950566  | -2.245923 | -0.052658 |
| C  | 3.862406  | 1.548982  | 0.637667  |
| C  | -3.828095 | -1.567744 | 0.782327  |
| H  | 4.677021  | 1.178380  | 1.253994  |
| C  | 2.627788  | 2.063736  | 1.107791  |
| H  | -0.664788 | -5.086930 | 1.593273  |
| H  | 1.094020  | -4.800333 | 1.484207  |
| C  | -2.572546 | -2.093944 | 1.178529  |
| H  | -4.611763 | -1.214066 | 1.446842  |
| C  | 0.109349  | -4.307962 | 1.506109  |
| Cl | -3.086064 | 1.353824  | 1.880854  |
| H  | -1.017988 | 4.758818  | 1.661491  |
| C  | -0.033722 | 4.266669  | 1.622810  |
| H  | 0.744217  | 5.043561  | 1.692992  |
| Cl | 0.039480  | -0.021588 | 1.633573  |
| H  | 2.344245  | 2.152646  | 2.154243  |
| Cl | 3.172441  | -1.401057 | 1.693193  |
| H  | -2.238859 | -2.210274 | 2.207357  |
| H  | 0.074738  | -3.681384 | 2.410359  |
| H  | 0.044130  | 3.616482  | 2.507492  |

Hf complex equilibrium geometry (singlet state)

|    |           |           |           |
|----|-----------|-----------|-----------|
| XX | 3.452642  | -0.579839 | -0.055472 |
| H  | 2.399062  | 2.658185  | -2.532305 |
| H  | -2.489493 | -2.712337 | -2.386266 |
| H  | -3.183341 | -0.063232 | -2.124508 |
| Cl | 1.305050  | -3.137330 | -1.760356 |
| H  | 3.105839  | 0.016084  | -2.237902 |

|    |           |           |           |
|----|-----------|-----------|-----------|
| H  | 3.902051  | 3.223423  | -1.750669 |
| H  | 2.412879  | 4.204643  | -1.662118 |
| C  | 2.805941  | 3.176209  | -1.650564 |
| Cl | -1.368219 | 3.099922  | -1.778626 |
| H  | -3.962477 | -3.259677 | -1.537671 |
| C  | -2.863450 | -3.210689 | -1.478976 |
| H  | -2.470633 | -4.239278 | -1.482344 |
| H  | -4.217409 | 2.271195  | -1.300149 |
| Cl | -0.028881 | -0.017119 | -1.617635 |
| H  | 4.169434  | -2.300386 | -1.400539 |
| C  | -3.320829 | 0.233044  | -1.087061 |
| C  | 3.280205  | -0.257757 | -1.199833 |
| C  | -3.869027 | 1.467822  | -0.657038 |
| C  | 3.843803  | -1.483170 | -0.762969 |
| H  | -0.809485 | -2.280614 | 0.038447  |
| C  | -2.949345 | -0.542590 | 0.058665  |
| Hf | 1.441086  | -1.500857 | -0.009833 |
| Si | 2.308409  | 2.313583  | -0.066440 |
| Si | -2.308410 | -2.313583 | 0.066434  |
| C  | 2.949345  | 0.542590  | -0.058666 |
| Hf | -1.441086 | 1.500857  | 0.009835  |
| H  | 0.809485  | 2.280614  | -0.038443 |
| C  | -3.843802 | 1.483169  | 0.762975  |
| C  | 3.869027  | -1.467819 | 0.657044  |
| H  | -4.169432 | 2.300383  | 1.400546  |
| C  | -3.280204 | 0.257755  | 1.199835  |
| H  | 3.962485  | 3.259685  | 1.537651  |
| H  | 2.470640  | 4.239286  | 1.482328  |
| C  | 3.320828  | -0.233041 | 1.087062  |
| H  | 4.217408  | -2.271191 | 1.300157  |
| C  | 2.863457  | 3.210696  | 1.478963  |
| Cl | 1.368219  | -3.099922 | 1.778627  |
| H  | -2.412889 | -4.204651 | 1.662103  |
| C  | -2.805952 | -3.176216 | 1.650551  |
| H  | -3.902062 | -3.223430 | 1.750650  |
| Cl | 0.028881  | 0.017119  | 1.617637  |
| H  | -3.105836 | -0.016089 | 2.237903  |
| Cl | -1.305049 | 3.137331  | 1.760357  |
| H  | 3.183339  | 0.063238  | 2.124509  |
| H  | 2.489505  | 2.712349  | 2.386257  |
| H  | -2.399077 | -2.658197 | 2.532297  |

Mo complex equilibrium geometry (singlet state)

|   |           |           |           |
|---|-----------|-----------|-----------|
| C | -2.484646 | -3.047637 | 1.651931  |
| C | 2.484652  | 3.047644  | -1.651922 |
| C | 2.543721  | 3.084492  | 1.487863  |
| C | -2.543729 | -3.084499 | -1.487854 |
| C | -2.689214 | -0.409838 | 0.053952  |
| C | -3.033057 | 0.408672  | 1.204320  |
| C | -3.074861 | 0.381630  | -1.102030 |
| C | -3.645647 | 1.611791  | 0.752391  |

|    |           |           |           |
|----|-----------|-----------|-----------|
| C  | -3.671254 | 1.595155  | -0.656680 |
| Cl | 0.030126  | 0.018366  | 1.645637  |
| Cl | -0.030126 | -0.018367 | -1.645639 |
| Cl | -1.231101 | 3.158007  | 1.670479  |
| Cl | 1.231101  | -3.158008 | -1.670478 |
| Cl | 1.292849  | -3.121305 | 1.693503  |
| Cl | -1.292849 | 3.121305  | -1.693504 |
| H  | 0.533526  | 2.093003  | -0.033120 |
| H  | -0.533527 | -2.093003 | 0.033110  |
| H  | 2.051397  | 4.059124  | -1.655557 |
| H  | -2.051404 | -4.059122 | 1.655563  |
| H  | -2.082327 | -2.513164 | 2.524734  |
| H  | 2.082348  | 2.513168  | -2.524730 |
| H  | 2.113089  | 4.097085  | 1.482779  |
| H  | -2.113094 | -4.097090 | -1.482769 |
| H  | 2.172133  | 2.572329  | 2.387273  |
| H  | -2.172149 | -2.572337 | -2.387267 |
| H  | 2.858207  | -0.151409 | -2.244327 |
| H  | -2.858211 | 0.151410  | 2.244325  |
| H  | -2.937366 | 0.100092  | -2.141359 |
| H  | 2.937369  | -0.100093 | 2.141357  |
| H  | -3.577997 | -3.134139 | 1.761670  |
| H  | 3.578002  | 3.134160  | -1.761650 |
| H  | 3.640511  | 3.170314  | 1.555910  |
| H  | -3.640519 | -3.170326 | -1.555893 |
| H  | -3.945149 | 2.445050  | 1.380149  |
| H  | 3.945151  | -2.445049 | -1.380153 |
| H  | 3.993628  | -2.413545 | 1.292620  |
| H  | -3.993629 | 2.413544  | -1.292624 |
| C  | 2.689214  | 0.409838  | -0.053954 |
| C  | 3.033055  | -0.408671 | -1.204322 |
| C  | 3.074863  | -0.381630 | 1.102028  |
| C  | 3.645648  | -1.611790 | -0.752395 |
| C  | 3.671254  | -1.595156 | 0.656677  |
| Mo | -1.374763 | 1.389511  | 0.009715  |
| Mo | 1.374764  | -1.389512 | -0.009716 |
| Si | 2.046081  | 2.176130  | -0.062798 |
| Si | -2.046082 | -2.176130 | 0.062801  |
| XX | 3.222807  | -0.717482 | -0.050393 |

Mo complex equilibrium geometry (triplet state)

|    |           |           |           |
|----|-----------|-----------|-----------|
| H  | 2.745625  | 2.901735  | -2.546132 |
| H  | -2.851954 | -2.962313 | -2.377640 |
| H  | -3.215127 | -0.257095 | -2.128052 |
| Cl | 1.454763  | -2.883475 | -1.635826 |
| H  | 3.139968  | 0.207383  | -2.245123 |
| H  | 4.304556  | 3.212347  | -1.730355 |
| H  | 3.001430  | 4.428649  | -1.681978 |
| C  | 3.213884  | 3.347660  | -1.654594 |
| Cl | -1.511957 | 2.851259  | -1.640369 |
| H  | -4.373918 | -3.252308 | -1.487985 |

|    |           |           |           |
|----|-----------|-----------|-----------|
| C  | -3.280903 | -3.386118 | -1.456023 |
| H  | -3.069044 | -4.467532 | -1.466043 |
| H  | -4.276539 | 2.063903  | -1.291507 |
| Cl | -0.026210 | -0.014860 | -1.498668 |
| H  | 4.230262  | -2.094651 | -1.392735 |
| C  | -3.352836 | 0.030406  | -1.088728 |
| C  | 3.313203  | -0.056588 | -1.204880 |
| C  | -3.942438 | 1.251810  | -0.652732 |
| C  | 3.917998  | -1.268096 | -0.761509 |
| H  | -1.058605 | -2.771658 | 0.043663  |
| C  | -2.976761 | -0.759625 | 0.061030  |
| Mo | 1.650981  | -1.138202 | -0.017719 |
| Si | 2.522029  | 2.604766  | -0.074282 |
| Si | -2.522036 | -2.604768 | 0.074299  |
| C  | 2.976757  | 0.759624  | -0.061059 |
| Mo | -1.650977 | 1.138205  | 0.017657  |
| H  | 1.058595  | 2.771648  | -0.043784 |
| C  | -3.917988 | 1.268124  | 0.761425  |
| C  | 3.942445  | -1.251823 | 0.652649  |
| H  | -4.230248 | 2.094697  | 1.392629  |
| C  | -3.313197 | 0.056622  | 1.204828  |
| H  | 4.373777  | 3.252241  | 1.488185  |
| H  | 3.068902  | 4.467463  | 1.466185  |
| C  | 3.352837  | -0.030434 | 1.088680  |
| H  | 4.276549  | -2.063933 | 1.291401  |
| C  | 3.280765  | 3.386050  | 1.456137  |
| Cl | 1.511963  | -2.851263 | 1.640301  |
| H  | -3.001313 | -4.428578 | 1.682114  |
| C  | -3.213763 | -3.347589 | 1.654701  |
| H  | -4.304427 | -3.212265 | 1.730547  |
| Cl | 0.026200  | 0.014823  | 1.498603  |
| H  | -3.139962 | -0.207320 | 2.245078  |
| Cl | -1.454738 | 2.883470  | 1.635768  |
| H  | 3.215131  | 0.257041  | 2.128012  |
| H  | 2.851738  | 2.962205  | 2.377700  |
| H  | -2.745425 | -2.901628 | 2.546179  |
| XX | 3.500648  | -0.369463 | -0.057224 |

Decontracted basis sets for silicon and hydrogen used in the NMR calculations:

Si 0

|   |   |                |              |
|---|---|----------------|--------------|
| S | 1 | 1.00           |              |
|   |   | 254900.0000000 | 0.625101D-04 |
| S | 1 | 1.0            |              |
|   |   | 38190.0000000  | 0.485553D-03 |
| S | 1 | 1.0            |              |
|   |   | 8690.0000000   | 0.254516D-02 |
| S | 1 | 1.0            |              |
|   |   | 2462.0000000   | 0.105866D-01 |
| S | 1 | 1.0            |              |
|   |   | 804.8000000    | 0.368787D-01 |

|   |   |      |                |               |
|---|---|------|----------------|---------------|
| S | 1 | 1.0  | 291.3000000    | 0.107479D+00  |
| S | 1 | 1.0  | 113.6000000    | 0.247936D+00  |
| S | 1 | 1.0  | 46.7500000     | 0.390927D+00  |
| S | 1 | 1.0  | 19.8200000     | 0.302026D+00  |
| S | 1 | 1.0  | 7.7080000      | 0.559236D-01  |
| S | 1 | 1.0  | 3.3400000      | -0.402406D-02 |
| S | 1 | 1.0  | 1.4020000      | 0.258030D-02  |
| S | 1 | 1.0  | 0.4387000      | -0.103821D-02 |
| S | 1 | 1.0  | 0.2070000      | 0.607930D-03  |
| S | 1 | 1.0  | 0.0794400      | -0.154022D-03 |
| S | 1 | 1.00 | 254900.0000000 | -0.166370D-04 |
| S | 1 | 1.0  | 38190.0000000  | -0.129310D-03 |
| S | 1 | 1.0  | 8690.0000000   | -0.678828D-03 |
| S | 1 | 1.0  | 2462.0000000   | -0.284117D-02 |
| S | 1 | 1.0  | 804.8000000    | -0.100551D-01 |
| S | 1 | 1.0  | 291.3000000    | -0.305774D-01 |
| S | 1 | 1.0  | 113.6000000    | -0.777256D-01 |
| S | 1 | 1.0  | 46.7500000     | -0.154236D+00 |
| S | 1 | 1.0  | 19.8200000     | -0.180368D+00 |
| S | 1 | 1.0  | 7.7080000      | 0.798218D-01  |
| S | 1 | 1.0  | 3.3400000      | 0.547441D+00  |
| S | 1 | 1.0  | 1.4020000      | 0.480119D+00  |
| S | 1 | 1.0  | 0.4387000      | 0.474846D-01  |
| S | 1 | 1.0  | 0.2070000      | -0.106996D-01 |
| S | 1 | 1.0  | 0.0794400      | 0.219871D-02  |
| S | 1 | 1.00 |                |               |

|   |   |                |               |
|---|---|----------------|---------------|
|   |   | 254900.0000000 | 0.426257D-05  |
| S | 1 | 1.0            |               |
|   |   | 38190.0000000  | 0.331062D-04  |
| S | 1 | 1.0            |               |
|   |   | 8690.0000000   | 0.174015D-03  |
| S | 1 | 1.0            |               |
|   |   | 2462.0000000   | 0.727574D-03  |
| S | 1 | 1.0            |               |
|   |   | 804.8000000    | 0.258333D-02  |
| S | 1 | 1.0            |               |
|   |   | 291.3000000    | 0.786354D-02  |
| S | 1 | 1.0            |               |
|   |   | 113.6000000    | 0.202155D-01  |
| S | 1 | 1.0            |               |
|   |   | 46.7500000     | 0.407320D-01  |
| S | 1 | 1.0            |               |
|   |   | 19.8200000     | 0.499358D-01  |
| S | 1 | 1.0            |               |
|   |   | 7.7080000      | -0.249396D-01 |
| S | 1 | 1.0            |               |
|   |   | 3.3400000      | -0.190350D+00 |
| S | 1 | 1.0            |               |
|   |   | 1.4020000      | -0.318350D+00 |
| S | 1 | 1.0            |               |
|   |   | 0.4387000      | 0.948036D-01  |
| S | 1 | 1.0            |               |
|   |   | 0.2070000      | 0.681180D+00  |
| S | 1 | 1.0            |               |
|   |   | 0.0794400      | 0.395672D+00  |
| S | 1 | 1.00           |               |
|   |   | 0.4387000      | 1.0000000     |
| S | 1 | 1.00           |               |
|   |   | 0.0794400      | 1.0000000     |
| P | 1 | 1.00           |               |
|   |   | 481.5000000    | 0.192045D-02  |
| P | 1 | 1.0            |               |
|   |   | 113.9000000    | 0.153552D-01  |
| P | 1 | 1.0            |               |
|   |   | 36.2300000     | 0.713991D-01  |
| P | 1 | 1.0            |               |
|   |   | 13.3400000     | 0.213052D+00  |
| P | 1 | 1.0            |               |
|   |   | 5.2520000      | 0.390354D+00  |
| P | 1 | 1.0            |               |
|   |   | 2.1200000      | 0.393721D+00  |
| P | 1 | 1.0            |               |
|   |   | 0.8561000      | 0.132565D+00  |
| P | 1 | 1.0            |               |
|   |   | 0.2528000      | 0.395630D-02  |
| P | 1 | 1.0            |               |
|   |   | 0.0788900      | 0.331624D-03  |



|      |   |             |  |               |
|------|---|-------------|--|---------------|
| P    | 1 | 1.00        |  |               |
|      |   | 481.5000000 |  | -0.405220D-03 |
| P    | 1 | 1.0         |  |               |
|      |   | 113.9000000 |  | -0.335896D-02 |
| P    | 1 | 1.0         |  |               |
|      |   | 36.2300000  |  | -0.152860D-01 |
| P    | 1 | 1.0         |  |               |
|      |   | 13.3400000  |  | -0.489218D-01 |
| P    | 1 | 1.0         |  |               |
|      |   | 5.2520000   |  | -0.855008D-01 |
| P    | 1 | 1.0         |  |               |
|      |   | 2.1200000   |  | -0.112137D+00 |
| P    | 1 | 1.0         |  |               |
|      |   | 0.8561000   |  | 0.618274D-01  |
| P    | 1 | 1.0         |  |               |
|      |   | 0.2528000   |  | 0.551919D+00  |
| P    | 1 | 1.0         |  |               |
|      |   | 0.0788900   |  | 0.523492D+00  |
| P    | 1 | 1.00        |  |               |
|      |   | 0.8561000   |  | 1.0000000     |
| P    | 1 | 1.00        |  |               |
|      |   | 0.0788900   |  | 1.0000000     |
| D    | 1 | 1.00        |  |               |
|      |   | 0.1590000   |  | 1.0000000     |
| D    | 1 | 1.00        |  |               |
|      |   | 0.4810000   |  | 1.0000000     |
| F    | 1 | 1.00        |  |               |
|      |   | 0.3360000   |  | 1.0000000     |
| S    | 1 | 1.00        |  |               |
|      |   | 0.0330000   |  | 1.0000000     |
| P    | 1 | 1.00        |  |               |
|      |   | 0.0237000   |  | 1.0000000     |
| D    | 1 | 1.00        |  |               |
|      |   | 0.0556000   |  | 1.0000000     |
| F    | 1 | 1.00        |  |               |
|      |   | 0.1250000   |  | 1.0000000     |
| **** |   |             |  |               |
| H 0  |   |             |  |               |
| S    | 1 | 1.00        |  |               |
|      |   | 33.8700000  |  | 0.0060680     |
| S    | 1 | 1.0         |  |               |
|      |   | 5.0950000   |  | 0.0453080     |
| S    | 1 | 1.0         |  |               |
|      |   | 1.1590000   |  | 0.2028220     |
| S    | 1 | 1.0         |  |               |
|      |   | 0.3258000   |  | 0.5039030     |
| S    | 1 | 1.0         |  |               |
|      |   | 0.1027000   |  | 0.3834210     |
| S    | 1 | 1.00        |  |               |
|      |   | 0.3258000   |  | 1.0000000     |
| S    | 1 | 1.00        |  |               |

|   |   |           |           |
|---|---|-----------|-----------|
|   |   | 0.1027000 | 1.0000000 |
| P | 1 | 1.00      |           |
|   |   | 1.4070000 | 1.0000000 |
| P | 1 | 1.00      |           |
|   |   | 0.3880000 | 1.0000000 |
| D | 1 | 1.00      |           |
|   |   | 1.0570000 | 1.0000000 |
| S | 1 | 1.00      |           |
|   |   | 0.0252600 | 1.0000000 |
| P | 1 | 1.00      |           |
|   |   | 0.1020000 | 1.0000000 |
| D | 1 | 1.00      |           |
|   |   | 0.2470000 | 1.0000000 |

\*\*\*\*

Metal basis sets and ECPs:

|    |    |                 |            |
|----|----|-----------------|------------|
| TI | 0  |                 |            |
| S  | 19 | 1.00            |            |
|    |    | 3014643.0000000 | 0.0001120  |
|    |    | 451432.9000000  | 0.0003320  |
|    |    | 102733.8000000  | 0.0009400  |
|    |    | 29098.1700000   | 0.0025320  |
|    |    | 9492.3300000    | 0.0068790  |
|    |    | 3426.3460000    | 0.0187490  |
|    |    | 1335.8960000    | 0.0492940  |
|    |    | 553.5026000     | 0.1166940  |
|    |    | 240.6925000     | 0.2273250  |
|    |    | 108.7293000     | 0.3105540  |
|    |    | 50.2645700      | 0.2205840  |
|    |    | 22.5800400      | 0.0732470  |
|    |    | 10.7143200      | 0.1131540  |
|    |    | 5.0935460       | 0.1136590  |
|    |    | 2.2441830       | 0.0193160  |
|    |    | 1.0595700       | -0.0004650 |
|    |    | 0.4688490       | 0.0001590  |
|    |    | 0.1061430       | -0.0000590 |
|    |    | 0.0552620       | 0.0000620  |
| S  | 19 | 1.00            |            |
|    |    | 3014643.0000000 | -0.0000630 |
|    |    | 451432.9000000  | -0.0001890 |
|    |    | 102733.8000000  | -0.0005350 |
|    |    | 29098.1700000   | -0.0014430 |
|    |    | 9492.3300000    | -0.0039330 |
|    |    | 3426.3460000    | -0.0107960 |
|    |    | 1335.8960000    | -0.0288290 |
|    |    | 553.5026000     | -0.0706740 |
|    |    | 240.6925000     | -0.1487780 |
|    |    | 108.7293000     | -0.2420600 |
|    |    | 50.2645700      | -0.2347210 |
|    |    | 22.5800400      | 0.0422060  |
|    |    | 10.7143200      | 0.4983350  |

|   |    |                 |            |
|---|----|-----------------|------------|
|   |    | 5.0935460       | 0.4868870  |
|   |    | 2.2441830       | 0.0879040  |
|   |    | 1.0595700       | -0.0052640 |
|   |    | 0.4688490       | 0.0005520  |
|   |    | 0.1061430       | -0.0006280 |
|   |    | 0.0552620       | 0.0005530  |
| S | 19 | 1.00            |            |
|   |    | 3014643.0000000 | 0.0000130  |
|   |    | 451432.9000000  | 0.0000380  |
|   |    | 102733.8000000  | 0.0001090  |
|   |    | 29098.1700000   | 0.0002940  |
|   |    | 9492.3300000    | 0.0008030  |
|   |    | 3426.3460000    | 0.0022200  |
|   |    | 1335.8960000    | 0.0059990  |
|   |    | 553.5026000     | 0.0151490  |
|   |    | 240.6925000     | 0.0337330  |
|   |    | 108.7293000     | 0.0615630  |
|   |    | 50.2645700      | 0.0694620  |
|   |    | 22.5800400      | -0.0241550 |
|   |    | 10.7143200      | -0.2789840 |
|   |    | 5.0935460       | -0.4386710 |
|   |    | 2.2441830       | 0.0909060  |
|   |    | 1.0595700       | 0.7091310  |
|   |    | 0.4688490       | 0.4311640  |
|   |    | 0.1061430       | 0.0258980  |
|   |    | 0.0552620       | -0.0110070 |
| S | 19 | 1.00            |            |
|   |    | 3014643.0000000 | -0.0000030 |
|   |    | 451432.9000000  | -0.0000090 |
|   |    | 102733.8000000  | -0.0000260 |
|   |    | 29098.1700000   | -0.0000700 |
|   |    | 9492.3300000    | -0.0001910 |
|   |    | 3426.3460000    | -0.0005260 |
|   |    | 1335.8960000    | -0.0014240 |
|   |    | 553.5026000     | -0.0035930 |
|   |    | 240.6925000     | -0.0080220 |
|   |    | 108.7293000     | -0.0146460 |
|   |    | 50.2645700      | -0.0166610 |
|   |    | 22.5800400      | 0.0058890  |
|   |    | 10.7143200      | 0.0693470  |
|   |    | 5.0935460       | 0.1159210  |
|   |    | 2.2441830       | -0.0327170 |
|   |    | 1.0595700       | -0.2334140 |
|   |    | 0.4688490       | -0.2869410 |
|   |    | 0.1061430       | 0.2839540  |
|   |    | 0.0552620       | 0.5841130  |
| S | 19 | 1.00            |            |
|   |    | 3014643.0000000 | -0.0000060 |
|   |    | 451432.9000000  | -0.0000170 |
|   |    | 102733.8000000  | -0.0000480 |
|   |    | 29098.1700000   | -0.0001310 |

|   |    |                 |            |
|---|----|-----------------|------------|
|   |    | 9492.3300000    | -0.0003460 |
|   |    | 3426.3460000    | -0.0010090 |
|   |    | 1335.8960000    | -0.0025320 |
|   |    | 553.5026000     | -0.0070420 |
|   |    | 240.6925000     | -0.0138290 |
|   |    | 108.7293000     | -0.0302210 |
|   |    | 50.2645700      | -0.0239810 |
|   |    | 22.5800400      | -0.0071850 |
|   |    | 10.7143200      | 0.1758840  |
|   |    | 5.0935460       | 0.1462460  |
|   |    | 2.2441830       | 0.0971840  |
|   |    | 1.0595700       | -1.0017360 |
|   |    | 0.4688490       | 0.1999570  |
|   |    | 0.1061430       | 2.2181040  |
|   |    | 0.0552620       | -1.3423230 |
| S | 19 | 1.00            |            |
|   |    | 3014643.0000000 | -0.0000090 |
|   |    | 451432.9000000  | -0.0000270 |
|   |    | 102733.8000000  | -0.0000750 |
|   |    | 29098.1700000   | -0.0002080 |
|   |    | 9492.3300000    | -0.0005370 |
|   |    | 3426.3460000    | -0.0016170 |
|   |    | 1335.8960000    | -0.0038870 |
|   |    | 553.5026000     | -0.0114190 |
|   |    | 240.6925000     | -0.0208780 |
|   |    | 108.7293000     | -0.0503970 |
|   |    | 50.2645700      | -0.0320930 |
|   |    | 22.5800400      | -0.0269460 |
|   |    | 10.7143200      | 0.3275740  |
|   |    | 5.0935460       | 0.2147230  |
|   |    | 2.2441830       | 0.1170160  |
|   |    | 1.0595700       | -2.4080240 |
|   |    | 0.4688490       | 2.5936190  |
|   |    | 0.1061430       | 0.1447480  |
|   |    | 0.0552620       | -2.5253120 |
| S | 1  | 1.00            |            |
|   |    | 0.0254650       | 1.0000000  |
| P | 15 | 1.00            |            |
|   |    | 11912.0300000   | 0.0001040  |
|   |    | 2819.9470000    | 0.0005330  |
|   |    | 915.9479000     | 0.0025880  |
|   |    | 350.3842000     | 0.0104700  |
|   |    | 148.4825000     | 0.0354710  |
|   |    | 67.5394400      | 0.0981640  |
|   |    | 32.3033200      | 0.2106310  |
|   |    | 15.9278600      | 0.3301970  |
|   |    | 8.0380350       | 0.3305000  |
|   |    | 4.0939160       | 0.1571860  |
|   |    | 2.0223900       | 0.0219670  |
|   |    | 0.9761020       | -0.0017610 |
|   |    | 0.4595950       | -0.0014300 |

|   |    |               |            |
|---|----|---------------|------------|
|   |    | 0.1771950     | -0.0002900 |
|   |    | 0.0734420     | 0.0000340  |
| P | 15 | 1.00          |            |
|   |    | 11912.0300000 | -0.0000350 |
|   |    | 2819.9470000  | -0.0001790 |
|   |    | 915.9479000   | -0.0008700 |
|   |    | 350.3842000   | -0.0035410 |
|   |    | 148.4825000   | -0.0121500 |
|   |    | 67.5394400    | -0.0344710 |
|   |    | 32.3033200    | -0.0765940 |
|   |    | 15.9278600    | -0.1256220 |
|   |    | 8.0380350     | -0.1320480 |
|   |    | 4.0939160     | 0.0193960  |
|   |    | 2.0223900     | 0.3164550  |
|   |    | 0.9761020     | 0.4614890  |
|   |    | 0.4595950     | 0.2980100  |
|   |    | 0.1771950     | 0.0495170  |
|   |    | 0.0734420     | -0.0041080 |
| P | 15 | 1.00          |            |
|   |    | 11912.0300000 | 0.0000080  |
|   |    | 2819.9470000  | 0.0000430  |
|   |    | 915.9479000   | 0.0002090  |
|   |    | 350.3842000   | 0.0008480  |
|   |    | 148.4825000   | 0.0029250  |
|   |    | 67.5394400    | 0.0082760  |
|   |    | 32.3033200    | 0.0185500  |
|   |    | 15.9278600    | 0.0303400  |
|   |    | 8.0380350     | 0.0327150  |
|   |    | 4.0939160     | -0.0087200 |
|   |    | 2.0223900     | -0.0886360 |
|   |    | 0.9761020     | -0.1491650 |
|   |    | 0.4595950     | -0.0932320 |
|   |    | 0.1771950     | 0.2507080  |
|   |    | 0.0734420     | 0.5861800  |
| P | 15 | 1.00          |            |
|   |    | 11912.0300000 | 0.0000100  |
|   |    | 2819.9470000  | 0.0000540  |
|   |    | 915.9479000   | 0.0002610  |
|   |    | 350.3842000   | 0.0010710  |
|   |    | 148.4825000   | 0.0036390  |
|   |    | 67.5394400    | 0.0104610  |
|   |    | 32.3033200    | 0.0229850  |
|   |    | 15.9278600    | 0.0386720  |
|   |    | 8.0380350     | 0.0394990  |
|   |    | 4.0939160     | -0.0068990 |
|   |    | 2.0223900     | -0.1146250 |
|   |    | 0.9761020     | -0.1708870 |
|   |    | 0.4595950     | -0.1652610 |
|   |    | 0.1771950     | 0.4058580  |
|   |    | 0.0734420     | 0.6742340  |
| P | 15 | 1.00          |            |

|   |   |              |            |
|---|---|--------------|------------|
|   |   | 11912.030000 | 0.0000210  |
|   |   | 2819.947000  | 0.0001010  |
|   |   | 915.947900   | 0.0005360  |
|   |   | 350.384200   | 0.0019840  |
|   |   | 148.482500   | 0.0075290  |
|   |   | 67.539440    | 0.0191510  |
|   |   | 32.303320    | 0.0486770  |
|   |   | 15.927860    | 0.0671790  |
|   |   | 8.038035     | 0.1039430  |
|   |   | 4.093916     | -0.0555620 |
|   |   | 2.022390     | -0.1916650 |
|   |   | 0.976102     | -0.6969070 |
|   |   | 0.459595     | 0.5747490  |
|   |   | 0.177195     | 1.1704990  |
|   |   | 0.073442     | -1.0063770 |
| P | 1 | 1.00         |            |
|   |   | 0.029334     | 1.0000000  |
| D | 7 | 1.00         |            |
|   |   | 64.340200    | 0.0038830  |
|   |   | 18.841800    | 0.0262040  |
|   |   | 6.719830     | 0.0968870  |
|   |   | 2.656130     | 0.2316310  |
|   |   | 1.073680     | 0.3519720  |
|   |   | 0.420557     | 0.3725630  |
|   |   | 0.154817     | 0.2505630  |
| D | 7 | 1.00         |            |
|   |   | 64.340200    | -0.0039790 |
|   |   | 18.841800    | -0.0267640 |
|   |   | 6.719830     | -0.1018940 |
|   |   | 2.656130     | -0.2371110 |
|   |   | 1.073680     | -0.3132860 |
|   |   | 0.420557     | -0.0465630 |
|   |   | 0.154817     | 0.5840720  |
| D | 7 | 1.00         |            |
|   |   | 64.340200    | 0.0063860  |
|   |   | 18.841800    | 0.0433010  |
|   |   | 6.719830     | 0.1702500  |
|   |   | 2.656130     | 0.3719460  |
|   |   | 1.073680     | 0.2303500  |
|   |   | 0.420557     | -0.7820270 |
|   |   | 0.154817     | -0.1235850 |
| D | 1 | 1.00         |            |
|   |   | 0.051490     | 1.0000000  |
| F | 1 | 1.00         |            |
|   |   | 1.227400     | 1.0000000  |
| F | 1 | 1.00         |            |
|   |   | 0.278800     | 1.0000000  |
| G | 1 | 1.00         |            |
|   |   | 0.709200     | 1.0000000  |
| S | 1 | 1.00         |            |
|   |   | 0.011730     | 1.0000000  |

|   |   |           |           |
|---|---|-----------|-----------|
| P | 1 | 1.00      |           |
|   |   | 0.0117200 | 1.0000000 |
| D | 1 | 1.00      |           |
|   |   | 0.0171200 | 1.0000000 |
| F | 1 | 1.00      |           |
|   |   | 0.0806900 | 1.0000000 |
| G | 1 | 1.00      |           |
|   |   | 0.2041300 | 1.0000000 |

\*\*\*\*

-Zr 0

S 11 1.00

|                |                 |
|----------------|-----------------|
| 0.13682600E+03 | 0.40900000E-03  |
| 0.14512800E+02 | -0.38517000E-01 |
| 0.90698100E+01 | 0.21581500E+00  |
| 0.56664000E+01 | -0.17334000E+00 |
| 0.31131900E+01 | -0.47006700E+00 |
| 0.82348200E+00 | 0.76346100E+00  |
| 0.38119300E+00 | 0.50374000E+00  |
| 0.97792000E-01 | 0.37859000E-01  |
| 0.50839000E-01 | -0.15390000E-01 |
| 0.23693000E-01 | 0.48040000E-02  |
| 0.11000000E-01 | 0.00000000E+00  |

S 11 1.00

|                |                 |
|----------------|-----------------|
| 0.13682600E+03 | -0.14200000E-03 |
| 0.14512800E+02 | 0.13145000E-01  |
| 0.90698100E+01 | -0.75341000E-01 |
| 0.56664000E+01 | 0.69978000E-01  |
| 0.31131900E+01 | 0.15043600E+00  |
| 0.82348200E+00 | -0.32538200E+00 |
| 0.38119300E+00 | -0.35671200E+00 |
| 0.97792000E-01 | 0.30701400E+00  |
| 0.50839000E-01 | 0.62391800E+00  |
| 0.23693000E-01 | 0.26800500E+00  |
| 0.11000000E-01 | 0.00000000E+00  |

S 11 1.00

|                |                 |
|----------------|-----------------|
| 0.13682600E+03 | -0.31000000E-04 |
| 0.14512800E+02 | 0.19190000E-02  |
| 0.90698100E+01 | -0.50977000E-01 |
| 0.56664000E+01 | -0.15384000E-01 |
| 0.31131900E+01 | 0.43516600E+00  |
| 0.82348200E+00 | -0.11911120E+01 |
| 0.38119300E+00 | 0.12925700E+00  |
| 0.97792000E-01 | 0.26494430E+01  |
| 0.50839000E-01 | -0.18700320E+01 |
| 0.23693000E-01 | -0.37790700E+00 |
| 0.11000000E-01 | 0.00000000E+00  |

S 11 1.00

|                |                 |
|----------------|-----------------|
| 0.13682600E+03 | 0.94000000E-04  |
| 0.14512800E+02 | -0.10988000E-01 |
| 0.90698100E+01 | -0.30538000E-01 |

0.56664000E+01 -0.96135000E-01  
0.31131900E+01 0.80230800E+00  
0.82348200E+00 -0.32348630E+01  
0.38119300E+00 0.34978270E+01  
0.97792000E-01 -0.74688400E+00  
0.50839000E-01 -0.17815950E+01  
0.23693000E-01 0.17442010E+01  
0.11000000E-01 0.00000000E+00  
S 1 1.00  
0.23693000E-01 0.10000000E+01  
S 1 1.00  
0.11000000E-01 0.10000000E+01  
P 10 1.00  
0.17411900E+02 -0.11830000E-02  
0.10879900E+02 0.19174000E-01  
0.43280400E+01 -0.16007000E+00  
0.11386400E+01 0.40576200E+00  
0.57585500E+00 0.47362000E+00  
0.28867000E+00 0.23196100E+00  
0.12801400E+00 0.32662000E-01  
0.55290000E-01 0.63400000E-03  
0.23613000E-01 0.39100000E-03  
0.10100000E-01 0.00000000E+00  
P 10 1.00  
0.17411900E+02 -0.13400000E-03  
0.10879900E+02 -0.46090000E-02  
0.43280400E+01 0.48189000E-01  
0.11386400E+01 -0.14548400E+00  
0.57585500E+00 -0.18987400E+00  
0.28867000E+00 -0.77814000E-01  
0.12801400E+00 0.33195100E+00  
0.55290000E-01 0.58379200E+00  
0.23613000E-01 0.24686100E+00  
0.10100000E-01 0.00000000E+00  
P 10 1.00  
0.17411900E+02 -0.10700000E-03  
0.10879900E+02 -0.67180000E-02  
0.43280400E+01 0.68365000E-01  
0.11386400E+01 -0.20455000E+00  
0.57585500E+00 -0.27976500E+00  
0.28867000E+00 -0.98014000E-01  
0.12801400E+00 0.64995900E+00  
0.55290000E-01 0.49861100E+00  
0.23613000E-01 0.23340000E-01  
0.10100000E-01 0.00000000E+00  
P 10 1.00  
0.17411900E+02 0.31900000E-03  
0.10879900E+02 -0.13666000E-01  
0.43280400E+01 0.13165900E+00  
0.11386400E+01 -0.45381600E+00  
0.57585500E+00 -0.80191500E+00



0.28867000E+00 0.12831030E+01  
0.12801400E+00 0.59929200E+00  
0.55290000E-01 -0.10604800E+01  
0.23613000E-01 -0.76248000E-01  
0.10100000E-01 0.00000000E+00  
P 1 1.00  
0.23613000E-01 0.10000000E+01  
P 1 1.00  
0.10100000E-01 0.10000000E+01  
D 8 1.00  
0.18073200E+02 0.11410000E-02  
0.52195900E+01 -0.82810000E-02  
0.16998500E+01 0.93377000E-01  
0.83632300E+00 0.25097300E+00  
0.39335400E+00 0.34390700E+00  
0.17882400E+00 0.32983800E+00  
0.78275000E-01 0.21217700E+00  
0.32248000E-01 0.58590000E-01  
D 8 1.00  
0.18073200E+02 -0.12140000E-02  
0.52195900E+01 0.87890000E-02  
0.16998500E+01 -0.11643700E+00  
0.83632300E+00 -0.31261900E+00  
0.39335400E+00 -0.33881200E+00  
0.17882400E+00 0.10978700E+00  
0.78275000E-01 0.57448300E+00  
0.32248000E-01 0.32282100E+00  
D 8 1.00  
0.18073200E+02 0.16120000E-02  
0.52195900E+01 -0.11812000E-01  
0.16998500E+01 0.19971500E+00  
0.83632300E+00 0.50391400E+00  
0.39335400E+00 0.93700000E-02  
0.17882400E+00 -0.91166100E+00  
0.78275000E-01 0.85915000E-01  
0.32248000E-01 0.72855000E+00  
D 1 1.00  
0.32248000E-01 0.10000000E+01  
D 1 1.00  
0.13300000E-01 0.10000000E+01  
F 1 1.00  
0.73950000E+00 0.10000000E+01  
F 1 1.00  
0.19310000E+00 0.10000000E+01  
F 1 1.00  
0.61800000E-01 0.10000000E+01  
G 1 1.00  
0.41950000E+00 0.10000000E+01  
G 1 1.00  
0.13330000E+00 0.10000000E+01  
\*\*\*\*

```
-Zr 0
ECP28MDF, 4, 28
G-Komponente
1
2 1.000000 0.000000
S-G
2
2 8.636528 150.242994
2 3.717639 18.780036
P-G
4
2 7.626728 33.192791
2 7.453207 66.389039
2 3.358389 4.620726
2 3.229738 9.260270
D-G
4
2 5.938086 13.993383
2 5.825544 20.995882
2 2.205019 2.285166
2 2.206292 3.441260
F-G
2
2 4.800215 -5.239320
2 4.798992 -6.987424

-Hf 0
S 10 1.0
0.26504200E+02 0.32017000E-01
0.16584000E+02 -0.25833800E+00
0.10383100E+02 0.74195800E+00
0.64955000E+01 -0.59724600E+00
0.34643100E+01 -0.46743300E+00
0.98620000E+00 0.78143800E+00
0.45782800E+00 0.53375600E+00
0.13211800E+00 0.36380000E-01
0.66967000E-01 -0.13648000E-01
0.29010000E-01 0.19130000E-02
S 10 1.0
0.26504200E+02 -0.92200000E-02
0.16584000E+02 0.76675000E-01
0.10383100E+02 -0.22564100E+00
0.64955000E+01 0.18556800E+00
0.34643100E+01 0.15654900E+00
0.98620000E+00 -0.31141700E+00
0.45782800E+00 -0.39452300E+00
0.13211800E+00 0.20348300E+00
0.66967000E-01 0.68629600E+00
0.29010000E-01 0.31922600E+00
S 10 1.0
```

0.26504200E+02 -0.51870000E-02  
0.16584000E+02 0.78069000E-01  
0.10383100E+02 -0.26334100E+00  
0.64955000E+01 0.16317300E+00  
0.34643100E+01 0.41214500E+00  
0.98620000E+00 -0.92791900E+00  
0.45782800E+00 -0.35528500E+00  
0.13211800E+00 0.25901110E+01  
0.66967000E-01 -0.12877130E+01  
0.29010000E-01 -0.68288400E+00  
S 10 1.0  
0.26504200E+02 0.26620000E-01  
0.16584000E+02 -0.51092000E-01  
0.10383100E+02 -0.13386000E-01  
0.64955000E+01 -0.24939600E+00  
0.34643100E+01 0.11377230E+01  
0.98620000E+00 -0.32919740E+01  
0.45782800E+00 0.30952960E+01  
0.13211800E+00 0.52338100E+00  
0.66967000E-01 -0.29817690E+01  
0.29010000E-01 0.19815350E+01  
S 1 1.0  
0.29010000E-01 0.10000000E+01  
S 1 1.0  
0.12600000E-01 0.10000000E+01  
P 9 1.0  
0.15272400E+02 -0.24916000E-01  
0.95703500E+01 0.13496700E+00  
0.50361800E+01 -0.31452800E+00  
0.11521500E+01 0.47660400E+00  
0.56240100E+00 0.48419100E+00  
0.27420400E+00 0.18449400E+00  
0.12050500E+00 0.18639000E-01  
0.52812000E-01 0.15040000E-02  
0.22891000E-01 -0.29000000E-04  
P 9 1.0  
0.15272400E+02 0.66140000E-02  
0.95703500E+01 -0.36926000E-01  
0.50361800E+01 0.88777000E-01  
0.11521500E+01 -0.15141700E+00  
0.56240100E+00 -0.20415200E+00  
0.27420400E+00 -0.40135000E-01  
0.12050500E+00 0.36632600E+00  
0.52812000E-01 0.56269600E+00  
0.22891000E-01 0.22037900E+00  
P 9 1.0  
0.15272400E+02 0.94170000E-02  
0.95703500E+01 -0.53087000E-01  
0.50361800E+01 0.12828700E+00  
0.11521500E+01 -0.21700800E+00  
0.56240100E+00 -0.32512200E+00

0.27420400E+00 -0.46510000E-02  
0.12050500E+00 0.73434300E+00  
0.52812000E-01 0.38499800E+00  
0.22891000E-01 0.88690000E-02  
P 9 1.0  
0.15272400E+02 0.19046000E-01  
0.95703500E+01 -0.10395300E+00  
0.50361800E+01 0.25102700E+00  
0.11521500E+01 -0.52896300E+00  
0.56240100E+00 -0.80065700E+00  
0.27420400E+00 0.16510980E+01  
0.12050500E+00 0.11950800E+00  
0.52812000E-01 -0.95902300E+00  
0.22891000E-01 -0.27430000E-02  
P 1 1.0  
0.22891000E-01 0.10000000E+01  
P 1 1.0  
0.99000000E-02 0.10000000E+01  
D 8 1.0  
0.11975600E+02 -0.14780000E-02  
0.74799800E+01 0.18708000E-01  
0.46738300E+01 -0.58087000E-01  
0.11750300E+01 0.18233400E+00  
0.52835000E+00 0.34866400E+00  
0.22775700E+00 0.39335000E+00  
0.94169000E-01 0.27722300E+00  
0.36631000E-01 0.69834000E-01  
D 8 1.0  
0.11975600E+02 0.12390000E-02  
0.74799800E+01 -0.20216000E-01  
0.46738300E+01 0.66945000E-01  
0.11750300E+01 -0.23925600E+00  
0.52835000E+00 -0.47367700E+00  
0.22775700E+00 -0.84303000E-01  
0.94169000E-01 0.63333000E+00  
0.36631000E-01 0.34964300E+00  
D 8 1.0  
0.11975600E+02 -0.31330000E-02  
0.74799800E+01 0.33477000E-01  
0.46738300E+01 -0.10380900E+00  
0.11750300E+01 0.47168200E+00  
0.52835000E+00 0.51918900E+00  
0.22775700E+00 -0.10917460E+01  
0.94169000E-01 0.84120000E-02  
0.36631000E-01 0.72865700E+00  
D 1 1.0  
0.36631000E-01 0.10000000E+01  
D 1 1.0  
0.14200000E-01 0.10000000E+01  
F 1 1.0  
0.55210000E+00 0.10000000E+01

```
F 1 1.0
  0.16050000E+00  0.10000000E+01
F 1 1.0
  0.50500000E-01  0.10000000E+01
G 1 1.0
  0.35790000E+00  0.10000000E+01
G 1 1.0
  0.10740000E+00  0.10000000E+01
****
```

```
Hf 0
ECP60MDF 5 60
H-Komponente
1
2 1.000000 0.000000
S-H-Komponente
3
2 10.248856 478.237404
4 10.729127 0.388024
2 1.964856 -1.071232
P-H-Komponente
6
2 8.683462 101.046818
2 7.916920 212.197761
4 9.379243 0.132646
4 8.244209 0.453108
2 1.596686 -0.407914
2 1.710281 -0.561817
D-H-Komponente
6
2 5.189557 43.115467
2 5.253229 65.934732
4 5.937871 0.025912
4 5.712906 0.033741
2 1.014856 -0.280579
2 0.473712 -0.084849
F-H-Komponente
2
2 1.912608 4.811801
2 1.880740 6.418574;
G-H-Komponente
2
2 2.724180 -4.636585
2 2.708953 -5.767288

Mo 0
S 9 1.00
  170.0690000 0.0004530
  16.7338000 -0.0413800
  10.4587000 0.2326990
  6.5343400 -0.1825190
```

|   |   |             |            |
|---|---|-------------|------------|
|   |   | 3.6793500   | -0.4983180 |
|   |   | 1.0019200   | 0.7853790  |
|   |   | 0.4631400   | 0.5013700  |
|   |   | 0.1187270   | 0.0358290  |
|   |   | 0.0595140   | -0.0140370 |
| S | 9 | 1.00        |            |
|   |   | 170.0690000 | -0.0001560 |
|   |   | 16.7338000  | 0.0139920  |
|   |   | 10.4587000  | -0.0809630 |
|   |   | 6.5343400   | 0.0744540  |
|   |   | 3.6793500   | 0.1588830  |
|   |   | 1.0019200   | -0.3414150 |
|   |   | 0.4631400   | -0.3366740 |
|   |   | 0.1187270   | 0.3095560  |
|   |   | 0.0595140   | 0.6149970  |
| S | 9 | 1.00        |            |
|   |   | 170.0690000 | -0.0000750 |
|   |   | 16.7338000  | 0.0015070  |
|   |   | 10.4587000  | -0.0536740 |
|   |   | 6.5343400   | -0.0331090 |
|   |   | 3.6793500   | 0.5047010  |
|   |   | 1.0019200   | -1.3515930 |
|   |   | 0.4631400   | 0.3070100  |
|   |   | 0.1187270   | 2.3973260  |
|   |   | 0.0595140   | -1.6896850 |
| S | 9 | 1.00        |            |
|   |   | 170.0690000 | -0.0002980 |
|   |   | 16.7338000  | 0.0209690  |
|   |   | 10.4587000  | -0.1814220 |
|   |   | 6.5343400   | 0.1285330  |
|   |   | 3.6793500   | 0.7288700  |
|   |   | 1.0019200   | -3.4647110 |
|   |   | 0.4631400   | 3.8855920  |
|   |   | 0.1187270   | -1.5475660 |
|   |   | 0.0595140   | -0.7618020 |
| S | 1 | 1.00        |            |
|   |   | 0.0270390   | 1.0000000  |
| S | 1 | 1.00        |            |
|   |   | 0.0123000   | 1.0000000  |
| P | 8 | 1.00        |            |
|   |   | 20.3080000  | -0.0015140 |
|   |   | 12.6907000  | 0.0221680  |
|   |   | 5.1195000   | -0.1743690 |
|   |   | 1.3778300   | 0.4279430  |
|   |   | 0.6968240   | 0.4753060  |
|   |   | 0.3473670   | 0.2174030  |
|   |   | 0.1528190   | 0.0285240  |
|   |   | 0.0650490   | 0.0004610  |
| P | 8 | 1.00        |            |
|   |   | 20.3080000  | -0.0000830 |
|   |   | 12.6907000  | -0.0054470 |

|   |   |            |            |
|---|---|------------|------------|
|   |   | 5.1195000  | 0.0532030  |
|   |   | 1.3778300  | -0.1581500 |
|   |   | 0.6968240  | -0.1918290 |
|   |   | 0.3473670  | -0.0524490 |
|   |   | 0.1528190  | 0.3447620  |
|   |   | 0.0650490  | 0.5699340  |
| P | 8 | 1.00       |            |
|   |   | 20.3080000 | -0.0000340 |
|   |   | 12.6907000 | -0.0086930 |
|   |   | 5.1195000  | 0.0831140  |
|   |   | 1.3778300  | -0.2494680 |
|   |   | 0.6968240  | -0.3235300 |
|   |   | 0.3473670  | 0.0156020  |
|   |   | 0.1528190  | 0.6864390  |
|   |   | 0.0650490  | 0.4139530  |
| P | 8 | 1.00       |            |
|   |   | 20.3080000 | 0.0001020  |
|   |   | 12.6907000 | -0.0158590 |
|   |   | 5.1195000  | 0.1536300  |
|   |   | 1.3778300  | -0.5873860 |
|   |   | 0.6968240  | -0.6442110 |
|   |   | 0.3473670  | 1.3803170  |
|   |   | 0.1528190  | 0.3384870  |
|   |   | 0.0650490  | -0.9969510 |
| P | 1 | 1.00       |            |
|   |   | 0.0273390  | 1.0000000  |
| P | 1 | 1.00       |            |
|   |   | 0.0115000  | 1.0000000  |
| D | 7 | 1.00       |            |
|   |   | 22.6032000 | 0.0013060  |
|   |   | 6.3391400  | -0.0124380 |
|   |   | 2.1776300  | 0.1035120  |
|   |   | 1.1070000  | 0.2776610  |
|   |   | 0.5353720  | 0.3588570  |
|   |   | 0.2489800  | 0.3092260  |
|   |   | 0.1104090  | 0.1740360  |
| D | 7 | 1.00       |            |
|   |   | 22.6032000 | -0.0013410 |
|   |   | 6.3391400  | 0.0130470  |
|   |   | 2.1776300  | -0.1256280 |
|   |   | 1.1070000  | -0.3434410 |
|   |   | 0.5353720  | -0.2978970 |
|   |   | 0.2489800  | 0.2001940  |
|   |   | 0.1104090  | 0.5671490  |
| D | 7 | 1.00       |            |
|   |   | 22.6032000 | 0.0020230  |
|   |   | 6.3391400  | -0.0206910 |
|   |   | 2.1776300  | 0.2714220  |
|   |   | 1.1070000  | 0.5579390  |
|   |   | 0.5353720  | -0.2102870 |
|   |   | 0.2489800  | -0.8724070 |

|   |   |           |           |
|---|---|-----------|-----------|
|   |   | 0.1104090 | 0.2634070 |
| D | 1 | 1.00      |           |
|   |   | 0.0453770 | 1.0000000 |
| D | 1 | 1.00      |           |
|   |   | 0.0186000 | 1.0000000 |
| F | 1 | 1.00      |           |
|   |   | 1.2203000 | 1.0000000 |
| F | 1 | 1.00      |           |
|   |   | 0.3332000 | 1.0000000 |
| F | 1 | 1.00      |           |
|   |   | 0.1186000 | 1.0000000 |
| G | 1 | 1.00      |           |
|   |   | 0.7324000 | 1.0000000 |
| G | 1 | 1.00      |           |
|   |   | 0.2751000 | 1.0000000 |

\*\*\*\*

|                |   |             |              |
|----------------|---|-------------|--------------|
| MO             | 0 |             |              |
| MO-ECP         | 4 | 28          |              |
| g-ul potential |   |             |              |
|                | 1 |             |              |
| 2              |   | 1.0000000   | 0.0000000    |
| s-ul potential |   |             |              |
|                | 2 |             |              |
| 2              |   | 10.09700000 | 180.07685300 |
| 2              |   | 4.37567000  | 24.71592000  |
| p-ul potential |   |             |              |
|                | 4 |             |              |
| 2              |   | 9.12656400  | 41.22767800  |
| 2              |   | 8.86322300  | 82.45267000  |
| 2              |   | 4.04494800  | 6.34509200   |
| 2              |   | 3.86665700  | 12.45842300  |
| d-ul potential |   |             |              |
|                | 4 |             |              |
| 2              |   | 7.53575400  | 19.30874400  |
| 2              |   | 7.27897600  | 28.97767400  |
| 2              |   | 2.76320500  | 3.18951600   |
| 2              |   | 2.77208500  | 4.70016900   |
| f-ul potential |   |             |              |
|                | 2 |             |              |
| 2              |   | 6.30663300  | -7.17888800  |
| 2              |   | 6.35644800  | -9.74597800  |

All-electron basis sets used for the AIM analysis:

|    |    |                 |           |
|----|----|-----------------|-----------|
| TI | 0  |                 |           |
| S  | 19 | 1.00            |           |
|    |    | 3014643.0000000 | 0.0001120 |
|    |    | 451432.9000000  | 0.0003320 |
|    |    | 102733.8000000  | 0.0009400 |
|    |    | 29098.1700000   | 0.0025320 |
|    |    | 9492.3300000    | 0.0068790 |



|   |    |                 |            |
|---|----|-----------------|------------|
|   |    | 3426.3460000    | 0.0187490  |
|   |    | 1335.8960000    | 0.0492940  |
|   |    | 553.5026000     | 0.1166940  |
|   |    | 240.6925000     | 0.2273250  |
|   |    | 108.7293000     | 0.3105540  |
|   |    | 50.2645700      | 0.2205840  |
|   |    | 22.5800400      | 0.0732470  |
|   |    | 10.7143200      | 0.1131540  |
|   |    | 5.0935460       | 0.1136590  |
|   |    | 2.2441830       | 0.0193160  |
|   |    | 1.0595700       | -0.0004650 |
|   |    | 0.4688490       | 0.0001590  |
|   |    | 0.1061430       | -0.0000590 |
|   |    | 0.0552620       | 0.0000620  |
| S | 19 | 1.00            |            |
|   |    | 3014643.0000000 | -0.0000630 |
|   |    | 451432.9000000  | -0.0001890 |
|   |    | 102733.8000000  | -0.0005350 |
|   |    | 29098.1700000   | -0.0014430 |
|   |    | 9492.3300000    | -0.0039330 |
|   |    | 3426.3460000    | -0.0107960 |
|   |    | 1335.8960000    | -0.0288290 |
|   |    | 553.5026000     | -0.0706740 |
|   |    | 240.6925000     | -0.1487780 |
|   |    | 108.7293000     | -0.2420600 |
|   |    | 50.2645700      | -0.2347210 |
|   |    | 22.5800400      | 0.0422060  |
|   |    | 10.7143200      | 0.4983350  |
|   |    | 5.0935460       | 0.4868870  |
|   |    | 2.2441830       | 0.0879040  |
|   |    | 1.0595700       | -0.0052640 |
|   |    | 0.4688490       | 0.0005520  |
|   |    | 0.1061430       | -0.0006280 |
|   |    | 0.0552620       | 0.0005530  |
| S | 19 | 1.00            |            |
|   |    | 3014643.0000000 | 0.0000130  |
|   |    | 451432.9000000  | 0.0000380  |
|   |    | 102733.8000000  | 0.0001090  |
|   |    | 29098.1700000   | 0.0002940  |
|   |    | 9492.3300000    | 0.0008030  |
|   |    | 3426.3460000    | 0.0022200  |
|   |    | 1335.8960000    | 0.0059990  |
|   |    | 553.5026000     | 0.0151490  |
|   |    | 240.6925000     | 0.0337330  |
|   |    | 108.7293000     | 0.0615630  |
|   |    | 50.2645700      | 0.0694620  |
|   |    | 22.5800400      | -0.0241550 |
|   |    | 10.7143200      | -0.2789840 |
|   |    | 5.0935460       | -0.4386710 |
|   |    | 2.2441830       | 0.0909060  |
|   |    | 1.0595700       | 0.7091310  |

|   |    |                 |            |
|---|----|-----------------|------------|
|   |    | 0.4688490       | 0.4311640  |
|   |    | 0.1061430       | 0.0258980  |
|   |    | 0.0552620       | -0.0110070 |
| S | 19 | 1.00            |            |
|   |    | 3014643.0000000 | -0.0000030 |
|   |    | 451432.9000000  | -0.0000090 |
|   |    | 102733.8000000  | -0.0000260 |
|   |    | 29098.1700000   | -0.0000700 |
|   |    | 9492.3300000    | -0.0001910 |
|   |    | 3426.3460000    | -0.0005260 |
|   |    | 1335.8960000    | -0.0014240 |
|   |    | 553.5026000     | -0.0035930 |
|   |    | 240.6925000     | -0.0080220 |
|   |    | 108.7293000     | -0.0146460 |
|   |    | 50.2645700      | -0.0166610 |
|   |    | 22.5800400      | 0.0058890  |
|   |    | 10.7143200      | 0.0693470  |
|   |    | 5.0935460       | 0.1159210  |
|   |    | 2.2441830       | -0.0327170 |
|   |    | 1.0595700       | -0.2334140 |
|   |    | 0.4688490       | -0.2869410 |
|   |    | 0.1061430       | 0.2839540  |
|   |    | 0.0552620       | 0.5841130  |
| S | 19 | 1.00            |            |
|   |    | 3014643.0000000 | -0.0000060 |
|   |    | 451432.9000000  | -0.0000170 |
|   |    | 102733.8000000  | -0.0000480 |
|   |    | 29098.1700000   | -0.0001310 |
|   |    | 9492.3300000    | -0.0003460 |
|   |    | 3426.3460000    | -0.0010090 |
|   |    | 1335.8960000    | -0.0025320 |
|   |    | 553.5026000     | -0.0070420 |
|   |    | 240.6925000     | -0.0138290 |
|   |    | 108.7293000     | -0.0302210 |
|   |    | 50.2645700      | -0.0239810 |
|   |    | 22.5800400      | -0.0071850 |
|   |    | 10.7143200      | 0.1758840  |
|   |    | 5.0935460       | 0.1462460  |
|   |    | 2.2441830       | 0.0971840  |
|   |    | 1.0595700       | -1.0017360 |
|   |    | 0.4688490       | 0.1999570  |
|   |    | 0.1061430       | 2.2181040  |
|   |    | 0.0552620       | -1.3423230 |
| S | 19 | 1.00            |            |
|   |    | 3014643.0000000 | -0.0000090 |
|   |    | 451432.9000000  | -0.0000270 |
|   |    | 102733.8000000  | -0.0000750 |
|   |    | 29098.1700000   | -0.0002080 |
|   |    | 9492.3300000    | -0.0005370 |
|   |    | 3426.3460000    | -0.0016170 |
|   |    | 1335.8960000    | -0.0038870 |

|   |    |               |            |
|---|----|---------------|------------|
|   |    | 553.5026000   | -0.0114190 |
|   |    | 240.6925000   | -0.0208780 |
|   |    | 108.7293000   | -0.0503970 |
|   |    | 50.2645700    | -0.0320930 |
|   |    | 22.5800400    | -0.0269460 |
|   |    | 10.7143200    | 0.3275740  |
|   |    | 5.0935460     | 0.2147230  |
|   |    | 2.2441830     | 0.1170160  |
|   |    | 1.0595700     | -2.4080240 |
|   |    | 0.4688490     | 2.5936190  |
|   |    | 0.1061430     | 0.1447480  |
|   |    | 0.0552620     | -2.5253120 |
| S | 1  | 1.00          |            |
|   |    | 0.0254650     | 1.0000000  |
| P | 15 | 1.00          |            |
|   |    | 11912.0300000 | 0.0001040  |
|   |    | 2819.9470000  | 0.0005330  |
|   |    | 915.9479000   | 0.0025880  |
|   |    | 350.3842000   | 0.0104700  |
|   |    | 148.4825000   | 0.0354710  |
|   |    | 67.5394400    | 0.0981640  |
|   |    | 32.3033200    | 0.2106310  |
|   |    | 15.9278600    | 0.3301970  |
|   |    | 8.0380350     | 0.3305000  |
|   |    | 4.0939160     | 0.1571860  |
|   |    | 2.0223900     | 0.0219670  |
|   |    | 0.9761020     | -0.0017610 |
|   |    | 0.4595950     | -0.0014300 |
|   |    | 0.1771950     | -0.0002900 |
|   |    | 0.0734420     | 0.0000340  |
| P | 15 | 1.00          |            |
|   |    | 11912.0300000 | -0.0000350 |
|   |    | 2819.9470000  | -0.0001790 |
|   |    | 915.9479000   | -0.0008700 |
|   |    | 350.3842000   | -0.0035410 |
|   |    | 148.4825000   | -0.0121500 |
|   |    | 67.5394400    | -0.0344710 |
|   |    | 32.3033200    | -0.0765940 |
|   |    | 15.9278600    | -0.1256220 |
|   |    | 8.0380350     | -0.1320480 |
|   |    | 4.0939160     | 0.0193960  |
|   |    | 2.0223900     | 0.3164550  |
|   |    | 0.9761020     | 0.4614890  |
|   |    | 0.4595950     | 0.2980100  |
|   |    | 0.1771950     | 0.0495170  |
|   |    | 0.0734420     | -0.0041080 |
| P | 15 | 1.00          |            |
|   |    | 11912.0300000 | 0.0000080  |
|   |    | 2819.9470000  | 0.0000430  |
|   |    | 915.9479000   | 0.0002090  |
|   |    | 350.3842000   | 0.0008480  |

|   |    |               |            |
|---|----|---------------|------------|
|   |    | 148.4825000   | 0.0029250  |
|   |    | 67.5394400    | 0.0082760  |
|   |    | 32.3033200    | 0.0185500  |
|   |    | 15.9278600    | 0.0303400  |
|   |    | 8.0380350     | 0.0327150  |
|   |    | 4.0939160     | -0.0087200 |
|   |    | 2.0223900     | -0.0886360 |
|   |    | 0.9761020     | -0.1491650 |
|   |    | 0.4595950     | -0.0932320 |
|   |    | 0.1771950     | 0.2507080  |
|   |    | 0.0734420     | 0.5861800  |
| P | 15 | 1.00          |            |
|   |    | 11912.0300000 | 0.0000100  |
|   |    | 2819.9470000  | 0.0000540  |
|   |    | 915.9479000   | 0.0002610  |
|   |    | 350.3842000   | 0.0010710  |
|   |    | 148.4825000   | 0.0036390  |
|   |    | 67.5394400    | 0.0104610  |
|   |    | 32.3033200    | 0.0229850  |
|   |    | 15.9278600    | 0.0386720  |
|   |    | 8.0380350     | 0.0394990  |
|   |    | 4.0939160     | -0.0068990 |
|   |    | 2.0223900     | -0.1146250 |
|   |    | 0.9761020     | -0.1708870 |
|   |    | 0.4595950     | -0.1652610 |
|   |    | 0.1771950     | 0.4058580  |
|   |    | 0.0734420     | 0.6742340  |
| P | 15 | 1.00          |            |
|   |    | 11912.0300000 | 0.0000210  |
|   |    | 2819.9470000  | 0.0001010  |
|   |    | 915.9479000   | 0.0005360  |
|   |    | 350.3842000   | 0.0019840  |
|   |    | 148.4825000   | 0.0075290  |
|   |    | 67.5394400    | 0.0191510  |
|   |    | 32.3033200    | 0.0486770  |
|   |    | 15.9278600    | 0.0671790  |
|   |    | 8.0380350     | 0.1039430  |
|   |    | 4.0939160     | -0.0555620 |
|   |    | 2.0223900     | -0.1916650 |
|   |    | 0.9761020     | -0.6969070 |
|   |    | 0.4595950     | 0.5747490  |
|   |    | 0.1771950     | 1.1704990  |
|   |    | 0.0734420     | -1.0063770 |
| P | 1  | 1.00          |            |
|   |    | 0.0293340     | 1.0000000  |
| D | 7  | 1.00          |            |
|   |    | 64.3402000    | 0.0038830  |
|   |    | 18.8418000    | 0.0262040  |
|   |    | 6.7198300     | 0.0968870  |
|   |    | 2.6561300     | 0.2316310  |
|   |    | 1.0736800     | 0.3519720  |

|   |   |            |            |
|---|---|------------|------------|
|   |   | 0.4205570  | 0.3725630  |
|   |   | 0.1548170  | 0.2505630  |
| D | 7 | 1.00       |            |
|   |   | 64.3402000 | -0.0039790 |
|   |   | 18.8418000 | -0.0267640 |
|   |   | 6.7198300  | -0.1018940 |
|   |   | 2.6561300  | -0.2371110 |
|   |   | 1.0736800  | -0.3132860 |
|   |   | 0.4205570  | -0.0465630 |
|   |   | 0.1548170  | 0.5840720  |
| D | 7 | 1.00       |            |
|   |   | 64.3402000 | 0.0063860  |
|   |   | 18.8418000 | 0.0433010  |
|   |   | 6.7198300  | 0.1702500  |
|   |   | 2.6561300  | 0.3719460  |
|   |   | 1.0736800  | 0.2303500  |
|   |   | 0.4205570  | -0.7820270 |
|   |   | 0.1548170  | -0.1235850 |
| D | 1 | 1.00       |            |
|   |   | 0.0514900  | 1.0000000  |
| F | 1 | 1.00       |            |
|   |   | 1.2274000  | 1.0000000  |
| F | 1 | 1.00       |            |
|   |   | 0.2788000  | 1.0000000  |
| S | 1 | 1.00       |            |
|   |   | 0.0117300  | 1.0000000  |
| P | 1 | 1.00       |            |
|   |   | 0.0117200  | 1.0000000  |
| D | 1 | 1.00       |            |
|   |   | 0.0171200  | 1.0000000  |
| F | 1 | 1.00       |            |
|   |   | 0.0806900  | 1.0000000  |

\*\*\*\*

|    |    |              |              |
|----|----|--------------|--------------|
| Zr | 0  |              |              |
| S  | 26 | 1.00         |              |
|    |    | 1.374650E+08 | 3.900000E-05 |
|    |    | 2.198390E+07 | 1.020000E-04 |
|    |    | 4.663660E+06 | 2.830000E-04 |
|    |    | 1.230450E+06 | 6.530000E-04 |
|    |    | 3.829710E+05 | 1.417000E-03 |
|    |    | 1.347840E+05 | 2.929000E-03 |
|    |    | 5.189420E+04 | 6.014000E-03 |
|    |    | 2.131980E+04 | 1.243500E-02 |
|    |    | 9.179920E+03 | 2.619900E-02 |
|    |    | 4.092810E+03 | 5.546400E-02 |
|    |    | 1.875390E+03 | 1.132890E-01 |
|    |    | 8.796740E+02 | 2.051980E-01 |
|    |    | 4.217030E+02 | 2.861040E-01 |
|    |    | 2.065130E+02 | 2.401140E-01 |
|    |    | 1.032640E+02 | 9.437900E-02 |

|      |              |               |
|------|--------------|---------------|
|      | 5.264030E+01 | 7.068400E-02  |
|      | 2.724980E+01 | 9.376700E-02  |
|      | 1.421930E+01 | 3.962600E-02  |
|      | 7.390030E+00 | 1.037500E-02  |
|      | 3.757850E+00 | 8.367000E-03  |
|      | 1.823910E+00 | 1.955000E-03  |
|      | 8.720740E-01 | -5.900000E-05 |
|      | 3.965840E-01 | 1.300000E-05  |
|      | 1.045330E-01 | -1.100000E-05 |
|      | 5.568500E-02 | 8.000000E-06  |
|      | 2.496200E-02 | -2.000000E-06 |
| S 26 | 1.00         |               |
|      | 1.374650E+08 | -2.100000E-05 |
|      | 2.198390E+07 | -5.600000E-05 |
|      | 4.663660E+06 | -1.540000E-04 |
|      | 1.230450E+06 | -3.550000E-04 |
|      | 3.829710E+05 | -7.720000E-04 |
|      | 1.347840E+05 | -1.599000E-03 |
|      | 5.189420E+04 | -3.296000E-03 |
|      | 2.131980E+04 | -6.857000E-03 |
|      | 9.179920E+03 | -1.460800E-02 |
|      | 4.092810E+03 | -3.151900E-02 |
|      | 1.875390E+03 | -6.687900E-02 |
|      | 8.796740E+02 | -1.304680E-01 |
|      | 4.217030E+02 | -2.120310E-01 |
|      | 2.065130E+02 | -2.295690E-01 |
|      | 1.032640E+02 | -4.800500E-02 |
|      | 5.264030E+01 | 3.457620E-01  |
|      | 2.724980E+01 | 5.209040E-01  |
|      | 1.421930E+01 | 2.244900E-01  |
|      | 7.390030E+00 | 3.782600E-02  |
|      | 3.757850E+00 | 2.020800E-02  |
|      | 1.823910E+00 | 4.371000E-03  |
|      | 8.720740E-01 | -1.770000E-04 |
|      | 3.965840E-01 | -1.300000E-05 |
|      | 1.045330E-01 | -2.300000E-05 |
|      | 5.568500E-02 | 1.400000E-05  |
|      | 2.496200E-02 | -4.000000E-06 |
| S 26 | 1.00         |               |
|      | 1.374650E+08 | 6.000000E-06  |
|      | 2.198390E+07 | 1.500000E-05  |
|      | 4.663660E+06 | 4.300000E-05  |
|      | 1.230450E+06 | 9.900000E-05  |
|      | 3.829710E+05 | 2.150000E-04  |
|      | 1.347840E+05 | 4.470000E-04  |
|      | 5.189420E+04 | 9.250000E-04  |
|      | 2.131980E+04 | 1.930000E-03  |
|      | 9.179920E+03 | 4.153000E-03  |
|      | 4.092810E+03 | 9.071000E-03  |
|      | 1.875390E+03 | 1.982800E-02  |
|      | 8.796740E+02 | 4.053000E-02  |

|              |               |
|--------------|---------------|
| 4.217030E+02 | 7.244800E-02  |
| 2.065130E+02 | 8.842200E-02  |
| 1.032640E+02 | 1.506700E-02  |
| 5.264030E+01 | -2.428610E-01 |
| 2.724980E+01 | -4.974240E-01 |
| 1.421930E+01 | -2.335070E-01 |
| 7.390030E+00 | 4.854210E-01  |
| 3.757850E+00 | 7.020170E-01  |
| 1.823910E+00 | 1.631350E-01  |
| 8.720740E-01 | 1.655000E-03  |
| 3.965840E-01 | 3.001000E-03  |
| 1.045330E-01 | -3.620000E-04 |
| 5.568500E-02 | 2.950000E-04  |
| 2.496200E-02 | -8.100000E-05 |
| S 26 1.00    |               |
| 1.374650E+08 | -2.000000E-06 |
| 2.198390E+07 | -6.000000E-06 |
| 4.663660E+06 | -1.600000E-05 |
| 1.230450E+06 | -3.700000E-05 |
| 3.829710E+05 | -8.000000E-05 |
| 1.347840E+05 | -1.660000E-04 |
| 5.189420E+04 | -3.430000E-04 |
| 2.131980E+04 | -7.160000E-04 |
| 9.179920E+03 | -1.538000E-03 |
| 4.092810E+03 | -3.362000E-03 |
| 1.875390E+03 | -7.328000E-03 |
| 8.796740E+02 | -1.500400E-02 |
| 4.217030E+02 | -2.671200E-02 |
| 2.065130E+02 | -3.291500E-02 |
| 1.032640E+02 | -5.423000E-03 |
| 5.264030E+01 | 9.426200E-02  |
| 2.724980E+01 | 2.112000E-01  |
| 1.421930E+01 | 9.743300E-02  |
| 7.390030E+00 | -2.577540E-01 |
| 3.757850E+00 | -6.437290E-01 |
| 1.823910E+00 | -1.211340E-01 |
| 8.720740E-01 | 7.660700E-01  |
| 3.965840E-01 | 5.479130E-01  |
| 1.045330E-01 | 4.337700E-02  |
| 5.568500E-02 | -1.667900E-02 |
| 2.496200E-02 | 4.758000E-03  |
| S 26 1.00    |               |
| 1.374650E+08 | 1.000000E-06  |
| 2.198390E+07 | 2.000000E-06  |
| 4.663660E+06 | 4.000000E-06  |
| 1.230450E+06 | 1.000000E-05  |
| 3.829710E+05 | 2.200000E-05  |
| 1.347840E+05 | 4.600000E-05  |
| 5.189420E+04 | 9.400000E-05  |
| 2.131980E+04 | 1.970000E-04  |
| 9.179920E+03 | 4.230000E-04  |

|              |               |
|--------------|---------------|
| 4.092810E+03 | 9.270000E-04  |
| 1.875390E+03 | 2.018000E-03  |
| 8.796740E+02 | 4.142000E-03  |
| 4.217030E+02 | 7.360000E-03  |
| 2.065130E+02 | 9.119000E-03  |
| 1.032640E+02 | 1.443000E-03  |
| 5.264030E+01 | -2.614600E-02 |
| 2.724980E+01 | -5.964900E-02 |
| 1.421930E+01 | -2.707700E-02 |
| 7.390030E+00 | 7.412400E-02  |
| 3.757850E+00 | 2.051780E-01  |
| 1.823910E+00 | 3.169600E-02  |
| 8.720740E-01 | -3.079690E-01 |
| 3.965840E-01 | -3.842290E-01 |
| 1.045330E-01 | 2.243790E-01  |
| 5.568500E-02 | 6.526520E-01  |
| 2.496200E-02 | 3.189420E-01  |
| S 26 1.00    |               |
| 1.374650E+08 | 1.000000E-06  |
| 2.198390E+07 | 3.000000E-06  |
| 4.663660E+06 | 8.000000E-06  |
| 1.230450E+06 | 1.800000E-05  |
| 3.829710E+05 | 3.900000E-05  |
| 1.347840E+05 | 8.100000E-05  |
| 5.189420E+04 | 1.710000E-04  |
| 2.131980E+04 | 3.470000E-04  |
| 9.179920E+03 | 7.770000E-04  |
| 4.092810E+03 | 1.605000E-03  |
| 1.875390E+03 | 3.757000E-03  |
| 8.796740E+02 | 7.036000E-03  |
| 4.217030E+02 | 1.413700E-02  |
| 2.065130E+02 | 1.397400E-02  |
| 1.032640E+02 | 8.252000E-03  |
| 5.264030E+01 | -6.002700E-02 |
| 2.724980E+01 | -8.058000E-02 |
| 1.421930E+01 | -1.032140E-01 |
| 7.390030E+00 | 2.392630E-01  |
| 3.757850E+00 | 2.188950E-01  |
| 1.823910E+00 | 3.606080E-01  |
| 8.720740E-01 | -1.333999E+00 |
| 3.965840E-01 | 5.622500E-02  |
| 1.045330E-01 | 2.598673E+00  |
| 5.568500E-02 | -1.590164E+00 |
| 2.496200E-02 | -5.543430E-01 |
| S 26 1.00    |               |
| 1.374650E+08 | 2.000000E-06  |
| 2.198390E+07 | 4.000000E-06  |
| 4.663660E+06 | 1.200000E-05  |
| 1.230450E+06 | 2.700000E-05  |
| 3.829710E+05 | 5.800000E-05  |
| 1.347840E+05 | 1.180000E-04  |



|      |              |               |
|------|--------------|---------------|
|      | 5.189420E+04 | 2.540000E-04  |
|      | 2.131980E+04 | 5.000000E-04  |
|      | 9.179920E+03 | 1.171000E-03  |
|      | 4.092810E+03 | 2.282000E-03  |
|      | 1.875390E+03 | 5.740000E-03  |
|      | 8.796740E+02 | 9.809000E-03  |
|      | 4.217030E+02 | 2.221600E-02  |
|      | 2.065130E+02 | 1.721700E-02  |
|      | 1.032640E+02 | 2.037200E-02  |
|      | 5.264030E+01 | -1.080960E-01 |
|      | 2.724980E+01 | -8.461300E-02 |
|      | 1.421930E+01 | -2.264530E-01 |
|      | 7.390030E+00 | 5.213300E-01  |
|      | 3.757850E+00 | 1.380690E-01  |
|      | 1.823910E+00 | 8.852170E-01  |
|      | 8.720740E-01 | -3.709192E+00 |
|      | 3.965840E-01 | 3.475697E+00  |
|      | 1.045330E-01 | -2.666100E-01 |
|      | 5.568500E-02 | -2.271272E+00 |
|      | 2.496200E-02 | 1.833948E+00  |
| S 1  | 1.00         |               |
|      | 2.496200E-02 | 1.000000E+00  |
| P 21 | 1.00         |               |
|      | 1.026890E+06 | 1.400000E-05  |
|      | 1.663250E+05 | 5.400000E-05  |
|      | 3.738190E+04 | 2.110000E-04  |
|      | 1.077160E+04 | 7.820000E-04  |
|      | 3.733590E+03 | 2.824000E-03  |
|      | 1.480440E+03 | 9.644000E-03  |
|      | 6.461670E+02 | 2.992700E-02  |
|      | 3.016820E+02 | 8.159300E-02  |
|      | 1.475910E+02 | 1.827890E-01  |
|      | 7.458000E+01 | 3.108630E-01  |
|      | 3.853850E+01 | 3.449150E-01  |
|      | 2.021330E+01 | 1.912910E-01  |
|      | 1.068870E+01 | 3.583100E-02  |
|      | 5.653870E+00 | -5.564000E-03 |
|      | 2.959510E+00 | -4.994000E-03 |
|      | 1.509350E+00 | -7.890000E-04 |
|      | 7.426710E-01 | 3.200000E-05  |
|      | 3.561060E-01 | 8.400000E-05  |
|      | 1.432030E-01 | 5.000000E-06  |
|      | 6.136600E-02 | 3.000000E-06  |
|      | 2.538000E-02 | -1.000000E-06 |
| P 21 | 1.00         |               |
|      | 1.026890E+06 | -6.000000E-06 |
|      | 1.663250E+05 | -2.200000E-05 |
|      | 3.738190E+04 | -8.600000E-05 |
|      | 1.077160E+04 | -3.200000E-04 |
|      | 3.733590E+03 | -1.159000E-03 |
|      | 1.480440E+03 | -3.983000E-03 |

|              |               |
|--------------|---------------|
| 6.461670E+02 | -1.253200E-02 |
| 3.016820E+02 | -3.505300E-02 |
| 1.475910E+02 | -8.182300E-02 |
| 7.458000E+01 | -1.469170E-01 |
| 3.853850E+01 | -1.665300E-01 |
| 2.021330E+01 | -1.958000E-03 |
| 1.068870E+01 | 3.022470E-01  |
| 5.653870E+00 | 4.800820E-01  |
| 2.959510E+00 | 2.895230E-01  |
| 1.509350E+00 | 4.606200E-02  |
| 7.426710E-01 | -1.009000E-03 |
| 3.561060E-01 | -2.648000E-03 |
| 1.432030E-01 | -2.700000E-04 |
| 6.136600E-02 | -5.500000E-05 |
| 2.538000E-02 | 1.200000E-05  |
| P 21 1.00    |               |
| 1.026890E+06 | 2.000000E-06  |
| 1.663250E+05 | 8.000000E-06  |
| 3.738190E+04 | 3.000000E-05  |
| 1.077160E+04 | 1.130000E-04  |
| 3.733590E+03 | 4.080000E-04  |
| 1.480440E+03 | 1.403000E-03  |
| 6.461670E+02 | 4.424000E-03  |
| 3.016820E+02 | 1.240700E-02  |
| 1.475910E+02 | 2.911800E-02  |
| 7.458000E+01 | 5.263500E-02  |
| 3.853850E+01 | 5.992900E-02  |
| 2.021330E+01 | -6.529000E-03 |
| 1.068870E+01 | -1.338850E-01 |
| 5.653870E+00 | -2.384410E-01 |
| 2.959510E+00 | -1.409390E-01 |
| 1.509350E+00 | 2.670430E-01  |
| 7.426710E-01 | 5.264040E-01  |
| 3.561060E-01 | 3.500400E-01  |
| 1.432030E-01 | 6.079500E-02  |
| 6.136600E-02 | -3.512000E-03 |
| 2.538000E-02 | 1.743000E-03  |
| P 21 1.00    |               |
| 1.026890E+06 | -1.000000E-06 |
| 1.663250E+05 | -2.000000E-06 |
| 3.738190E+04 | -8.000000E-06 |
| 1.077160E+04 | -3.100000E-05 |
| 3.733590E+03 | -1.120000E-04 |
| 1.480440E+03 | -3.850000E-04 |
| 6.461670E+02 | -1.216000E-03 |
| 3.016820E+02 | -3.403000E-03 |
| 1.475910E+02 | -8.015000E-03 |
| 7.458000E+01 | -1.444500E-02 |
| 3.853850E+01 | -1.657500E-02 |
| 2.021330E+01 | 2.216000E-03  |
| 1.068870E+01 | 3.732300E-02  |

|              |               |
|--------------|---------------|
| 5.653870E+00 | 6.903900E-02  |
| 2.959510E+00 | 3.782500E-02  |
| 1.509350E+00 | -8.772600E-02 |
| 7.426710E-01 | -2.031560E-01 |
| 3.561060E-01 | -1.411200E-01 |
| 1.432030E-01 | 2.623720E-01  |
| 6.136600E-02 | 6.031610E-01  |
| 2.538000E-02 | 2.995440E-01  |
| P 21 1.00    |               |
| 1.026890E+06 | -1.000000E-06 |
| 1.663250E+05 | -3.000000E-06 |
| 3.738190E+04 | -1.200000E-05 |
| 1.077160E+04 | -4.400000E-05 |
| 3.733590E+03 | -1.580000E-04 |
| 1.480440E+03 | -5.440000E-04 |
| 6.461670E+02 | -1.717000E-03 |
| 3.016820E+02 | -4.812000E-03 |
| 1.475910E+02 | -1.130900E-02 |
| 7.458000E+01 | -2.043900E-02 |
| 3.853850E+01 | -2.334200E-02 |
| 2.021330E+01 | 2.934000E-03  |
| 1.068870E+01 | 5.300200E-02  |
| 5.653870E+00 | 9.693500E-02  |
| 2.959510E+00 | 5.530000E-02  |
| 1.509350E+00 | -1.263110E-01 |
| 7.426710E-01 | -2.883080E-01 |
| 3.561060E-01 | -2.127200E-01 |
| 1.432030E-01 | 5.617710E-01  |
| 6.136600E-02 | 5.907190E-01  |
| 2.538000E-02 | 4.064900E-02  |
| P 21 1.00    |               |
| 1.026890E+06 | -1.000000E-06 |
| 1.663250E+05 | -5.000000E-06 |
| 3.738190E+04 | -2.000000E-05 |
| 1.077160E+04 | -7.300000E-05 |
| 3.733590E+03 | -2.750000E-04 |
| 1.480440E+03 | -9.030000E-04 |
| 6.461670E+02 | -3.005000E-03 |
| 3.016820E+02 | -7.931000E-03 |
| 1.475910E+02 | -1.998900E-02 |
| 7.458000E+01 | -3.298400E-02 |
| 3.853850E+01 | -4.442900E-02 |
| 2.021330E+01 | 1.520600E-02  |
| 1.068870E+01 | 7.215900E-02  |
| 5.653870E+00 | 2.108560E-01  |
| 2.959510E+00 | 2.893500E-02  |
| 1.509350E+00 | -1.300640E-01 |
| 7.426710E-01 | -1.052978E+00 |
| 3.561060E-01 | 8.409110E-01  |
| 1.432030E-01 | 1.112199E+00  |
| 6.136600E-02 | -1.157655E+00 |

|      |              |               |
|------|--------------|---------------|
|      | 2.538000E-02 | -1.222470E-01 |
| P 1  | 1.00         |               |
|      | 2.538000E-02 | 1.000000E+00  |
| D 14 | 1.00         |               |
|      | 1.873980E+03 | 1.650000E-04  |
|      | 5.384570E+02 | 1.476000E-03  |
|      | 2.013810E+02 | 8.701000E-03  |
|      | 8.772280E+01 | 3.425200E-02  |
|      | 4.149510E+01 | 1.005890E-01  |
|      | 2.047460E+01 | 2.180290E-01  |
|      | 1.031470E+01 | 3.259560E-01  |
|      | 5.232370E+00 | 3.343750E-01  |
|      | 2.626560E+00 | 1.951030E-01  |
|      | 1.252140E+00 | 4.521400E-02  |
|      | 5.665690E-01 | 1.854000E-03  |
|      | 2.447510E-01 | 4.680000E-04  |
|      | 1.007930E-01 | -1.050000E-04 |
|      | 3.872100E-02 | 5.200000E-05  |
| D 14 | 1.00         |               |
|      | 1.873980E+03 | -3.600000E-05 |
|      | 5.384570E+02 | -3.200000E-04 |
|      | 2.013810E+02 | -1.889000E-03 |
|      | 8.772280E+01 | -7.486000E-03 |
|      | 4.149510E+01 | -2.215500E-02 |
|      | 2.047460E+01 | -4.838300E-02 |
|      | 1.031470E+01 | -6.982500E-02 |
|      | 5.232370E+00 | -6.628400E-02 |
|      | 2.626560E+00 | 9.345000E-03  |
|      | 1.252140E+00 | 1.800330E-01  |
|      | 5.665690E-01 | 3.375510E-01  |
|      | 2.447510E-01 | 3.797130E-01  |
|      | 1.007930E-01 | 2.816470E-01  |
|      | 3.872100E-02 | 9.450100E-02  |
| D 14 | 1.00         |               |
|      | 1.873980E+03 | 3.800000E-05  |
|      | 5.384570E+02 | 3.410000E-04  |
|      | 2.013810E+02 | 2.007000E-03  |
|      | 8.772280E+01 | 7.971000E-03  |
|      | 4.149510E+01 | 2.359600E-02  |
|      | 2.047460E+01 | 5.165200E-02  |
|      | 1.031470E+01 | 7.371300E-02  |
|      | 5.232370E+00 | 6.816100E-02  |
|      | 2.626560E+00 | -2.217100E-02 |
|      | 1.252140E+00 | -2.243400E-01 |
|      | 5.665690E-01 | -4.064670E-01 |
|      | 2.447510E-01 | -1.230570E-01 |
|      | 1.007930E-01 | 5.401810E-01  |
|      | 3.872100E-02 | 4.639430E-01  |
| D 14 | 1.00         |               |
|      | 1.873980E+03 | -5.100000E-05 |
|      | 5.384570E+02 | -4.560000E-04 |

|      |              |               |
|------|--------------|---------------|
|      | 2.013810E+02 | -2.710000E-03 |
|      | 8.772280E+01 | -1.070100E-02 |
|      | 4.149510E+01 | -3.204500E-02 |
|      | 2.047460E+01 | -6.946400E-02 |
|      | 1.031470E+01 | -9.807300E-02 |
|      | 5.232370E+00 | -8.006300E-02 |
|      | 2.626560E+00 | 5.486900E-02  |
|      | 1.252140E+00 | 4.033390E-01  |
|      | 5.665690E-01 | 4.207990E-01  |
|      | 2.447510E-01 | -7.613030E-01 |
|      | 1.007930E-01 | -3.936520E-01 |
|      | 3.872100E-02 | 8.862560E-01  |
| D 1  | 1.00         |               |
|      | 3.872100E-02 | 1.000000E+00  |
| F 1  | 1.00         |               |
|      | 7.043000E-01 | 1.000000E+00  |
| F 1  | 1.00         |               |
|      | 1.873000E-01 | 1.000000E+00  |
| S 1  | 1.00         |               |
|      | 1.120000E-02 | 1.000000E+00  |
| P 1  | 1.00         |               |
|      | 1.050000E-02 | 1.000000E+00  |
| D 1  | 1.00         |               |
|      | 1.490000E-02 | 1.000000E+00  |
| F 1  | 1.00         |               |
|      | 6.310000E-02 | 1.000000E+00  |
|      | ****         |               |
| -Hf  | 0            |               |
| S 30 | 1.00         |               |
|      | 1.209352E+10 | 4.000000E-06  |
|      | 1.755709E+09 | 1.060000E-05  |
|      | 3.405127E+08 | 2.850000E-05  |
|      | 8.319553E+07 | 6.270000E-05  |
|      | 2.435708E+07 | 1.265000E-04  |
|      | 8.193356E+06 | 2.352000E-04  |
|      | 3.058833E+06 | 4.192000E-04  |
|      | 1.232418E+06 | 7.244000E-04  |
|      | 5.242476E+05 | 1.238000E-03  |
|      | 2.315739E+05 | 2.103600E-03  |
|      | 1.049682E+05 | 3.582500E-03  |
|      | 4.844357E+04 | 6.099100E-03  |
|      | 2.266140E+04 | 1.032270E-02  |
|      | 1.072633E+04 | 1.690020E-02  |
|      | 5.138808E+03 | 2.521230E-02  |
|      | 2.496078E+03 | 2.887580E-02  |
|      | 1.232232E+03 | 1.443390E-02  |
|      | 6.197951E+02 | -1.481000E-04 |
|      | 3.182361E+02 | 1.093465E-01  |
|      | 1.669069E+02 | 3.470565E-01  |
|      | 8.930310E+01 | 3.289259E-01  |

|              |               |
|--------------|---------------|
| 4.855668E+01 | 1.244939E-01  |
| 2.664003E+01 | 9.489160E-02  |
| 1.458614E+01 | 5.226050E-02  |
| 7.846900E+00 | 1.145840E-02  |
| 4.062263E+00 | 6.834100E-03  |
| 1.970383E+00 | 1.162100E-03  |
| 9.749930E-01 | -2.420000E-05 |
| 4.493950E-01 | -9.600000E-06 |
| 1.226740E-01 | -7.000000E-07 |
| S 32 1.00    |               |
| 1.209352E+10 | 2.020000E-05  |
| 1.755709E+09 | 5.330000E-05  |
| 3.405127E+08 | 1.428000E-04  |
| 8.319553E+07 | 3.147000E-04  |
| 2.435708E+07 | 6.354000E-04  |
| 8.193356E+06 | 1.183700E-03  |
| 3.058833E+06 | 2.116000E-03  |
| 1.232418E+06 | 3.674600E-03  |
| 5.242476E+05 | 6.323500E-03  |
| 2.315739E+05 | 1.086350E-02  |
| 1.049682E+05 | 1.880180E-02  |
| 4.844357E+04 | 3.285770E-02  |
| 2.266140E+04 | 5.796340E-02  |
| 1.072633E+04 | 1.021044E-01  |
| 5.138808E+03 | 1.745218E-01  |
| 2.496078E+03 | 2.710215E-01  |
| 1.232232E+03 | 3.349050E-01  |
| 6.197951E+02 | 2.513034E-01  |
| 3.182361E+02 | 8.755700E-03  |
| 1.669069E+02 | -2.118762E-01 |
| 8.930310E+01 | -2.094483E-01 |
| 4.855668E+01 | -7.305620E-02 |
| 2.664003E+01 | -3.593750E-02 |
| 1.458614E+01 | -1.881600E-02 |
| 7.846900E+00 | -3.853100E-03 |
| 4.062263E+00 | -2.101200E-03 |
| 1.970383E+00 | -3.737000E-04 |
| 9.749930E-01 | 1.370000E-05  |
| 4.493950E-01 | 1.200000E-06  |
| 1.226740E-01 | 1.200000E-06  |
| 6.214100E-02 | -7.000000E-07 |
| 2.785000E-02 | 2.000000E-07  |
| S 32 1.00    |               |
| 1.209352E+10 | 3.600000E-06  |
| 1.755709E+09 | 9.500000E-06  |
| 3.405127E+08 | 2.550000E-05  |
| 8.319553E+07 | 5.610000E-05  |
| 2.435708E+07 | 1.133000E-04  |
| 8.193356E+06 | 2.114000E-04  |
| 3.058833E+06 | 3.787000E-04  |
| 1.232418E+06 | 6.598000E-04  |

|              |               |
|--------------|---------------|
| 5.242476E+05 | 1.140700E-03  |
| 2.315739E+05 | 1.974100E-03  |
| 1.049682E+05 | 3.452000E-03  |
| 4.844357E+04 | 6.134100E-03  |
| 2.266140E+04 | 1.108870E-02  |
| 1.072633E+04 | 2.034370E-02  |
| 5.138808E+03 | 3.708120E-02  |
| 2.496078E+03 | 6.426080E-02  |
| 1.232232E+03 | 9.358410E-02  |
| 6.197951E+02 | 7.855680E-02  |
| 3.182361E+02 | -8.294720E-02 |
| 1.669069E+02 | -4.159398E-01 |
| 8.930310E+01 | -5.334647E-01 |
| 4.855668E+01 | 1.206950E-02  |
| 2.664003E+01 | 6.488933E-01  |
| 1.458614E+01 | 3.805257E-01  |
| 7.846900E+00 | 1.347113E-01  |
| 4.062263E+00 | 1.132714E-01  |
| 1.970383E+00 | 1.959320E-02  |
| 9.749930E-01 | -3.551000E-04 |
| 4.493950E-01 | -8.360000E-05 |
| 1.226740E-01 | -1.530000E-05 |
| 6.214100E-02 | 2.100000E-06  |
| 2.785000E-02 | -1.900000E-06 |
| S 32 1.00    |               |
| 1.209352E+10 | -2.100000E-06 |
| 1.755709E+09 | -5.700000E-06 |
| 3.405127E+08 | -1.520000E-05 |
| 8.319553E+07 | -3.340000E-05 |
| 2.435708E+07 | -6.750000E-05 |
| 8.193356E+06 | -1.259000E-04 |
| 3.058833E+06 | -2.255000E-04 |
| 1.232418E+06 | -3.928000E-04 |
| 5.242476E+05 | -6.788000E-04 |
| 2.315739E+05 | -1.174300E-03 |
| 1.049682E+05 | -2.051800E-03 |
| 4.844357E+04 | -3.643100E-03 |
| 2.266140E+04 | -6.575000E-03 |
| 1.072633E+04 | -1.203980E-02 |
| 5.138808E+03 | -2.187660E-02 |
| 2.496078E+03 | -3.778160E-02 |
| 1.232232E+03 | -5.487260E-02 |
| 6.197951E+02 | -4.622430E-02 |
| 3.182361E+02 | 5.115090E-02  |
| 1.669069E+02 | 2.756854E-01  |
| 8.930310E+01 | 3.901265E-01  |
| 4.855668E+01 | -4.071420E-02 |
| 2.664003E+01 | -9.229997E-01 |
| 1.458614E+01 | -6.832651E-01 |
| 7.846900E+00 | 5.959111E-01  |
| 4.062263E+00 | 8.336312E-01  |

|              |               |
|--------------|---------------|
| 1.970383E+00 | 1.541300E-01  |
| 9.749930E-01 | -2.555000E-03 |
| 4.493950E-01 | 2.130100E-03  |
| 1.226740E-01 | -4.566000E-04 |
| 6.214100E-02 | 2.920000E-04  |
| 2.785000E-02 | -9.400000E-05 |
| S 32 1.00    |               |
| 1.209352E+10 | 7.000000E-07  |
| 1.755709E+09 | 1.800000E-06  |
| 3.405127E+08 | 4.700000E-06  |
| 8.319553E+07 | 1.030000E-05  |
| 2.435708E+07 | 2.090000E-05  |
| 8.193356E+06 | 3.890000E-05  |
| 3.058833E+06 | 6.970000E-05  |
| 1.232418E+06 | 1.215000E-04  |
| 5.242476E+05 | 2.099000E-04  |
| 2.315739E+05 | 3.631000E-04  |
| 1.049682E+05 | 6.347000E-04  |
| 4.844357E+04 | 1.126600E-03  |
| 2.266140E+04 | 2.035000E-03  |
| 1.072633E+04 | 3.724500E-03  |
| 5.138808E+03 | 6.780000E-03  |
| 2.496078E+03 | 1.170510E-02  |
| 1.232232E+03 | 1.709030E-02  |
| 6.197951E+02 | 1.434770E-02  |
| 3.182361E+02 | -1.633580E-02 |
| 1.669069E+02 | -9.138810E-02 |
| 8.930310E+01 | -1.325812E-01 |
| 4.855668E+01 | 1.478650E-02  |
| 2.664003E+01 | 4.005955E-01  |
| 1.458614E+01 | 2.995483E-01  |
| 7.846900E+00 | -3.832038E-01 |
| 4.062263E+00 | -7.994775E-01 |
| 1.970383E+00 | -8.126500E-02 |
| 9.749930E-01 | 8.274524E-01  |
| 4.493950E-01 | 5.223973E-01  |
| 1.226740E-01 | 3.087970E-02  |
| 6.214100E-02 | -1.293960E-02 |
| 2.785000E-02 | 1.978900E-03  |
| S 32 1.00    |               |
| 1.209352E+10 | -2.000000E-07 |
| 1.755709E+09 | -5.000000E-07 |
| 3.405127E+08 | -1.300000E-06 |
| 8.319553E+07 | -2.800000E-06 |
| 2.435708E+07 | -5.600000E-06 |
| 8.193356E+06 | -1.050000E-05 |
| 3.058833E+06 | -1.870000E-05 |
| 1.232418E+06 | -3.260000E-05 |
| 5.242476E+05 | -5.640000E-05 |
| 2.315739E+05 | -9.750000E-05 |
| 1.049682E+05 | -1.705000E-04 |



|              |               |
|--------------|---------------|
| 4.844357E+04 | -3.025000E-04 |
| 2.266140E+04 | -5.468000E-04 |
| 1.072633E+04 | -9.998000E-04 |
| 5.138808E+03 | -1.822400E-03 |
| 2.496078E+03 | -3.142000E-03 |
| 1.232232E+03 | -4.598100E-03 |
| 6.197951E+02 | -3.844100E-03 |
| 3.182361E+02 | 4.375700E-03  |
| 1.669069E+02 | 2.472010E-02  |
| 8.930310E+01 | 3.576180E-02  |
| 4.855668E+01 | -3.821500E-03 |
| 2.664003E+01 | -1.109845E-01 |
| 1.458614E+01 | -8.227100E-02 |
| 7.846900E+00 | 1.087536E-01  |
| 4.062263E+00 | 2.478151E-01  |
| 1.970383E+00 | 2.248250E-02  |
| 9.749930E-01 | -3.324083E-01 |
| 4.493950E-01 | -3.848196E-01 |
| 1.226740E-01 | 2.742196E-01  |
| 6.214100E-02 | 6.568257E-01  |
| 2.785000E-02 | 2.799885E-01  |
| S 31 1.00    |               |
| 1.755709E+09 | -1.000000E-06 |
| 3.405127E+08 | -2.000000E-06 |
| 8.319553E+07 | -5.000000E-06 |
| 2.435708E+07 | -9.000000E-06 |
| 8.193356E+06 | -1.800000E-05 |
| 3.058833E+06 | -3.100000E-05 |
| 1.232418E+06 | -5.500000E-05 |
| 5.242476E+05 | -9.400000E-05 |
| 2.315739E+05 | -1.640000E-04 |
| 1.049682E+05 | -2.840000E-04 |
| 4.844357E+04 | -5.110000E-04 |
| 2.266140E+04 | -9.040000E-04 |
| 1.072633E+04 | -1.702000E-03 |
| 5.138808E+03 | -2.984000E-03 |
| 2.496078E+03 | -5.424000E-03 |
| 1.232232E+03 | -7.308000E-03 |
| 6.197951E+02 | -7.383000E-03 |
| 3.182361E+02 | 9.581000E-03  |
| 1.669069E+02 | 3.630700E-02  |
| 8.930310E+01 | 7.150500E-02  |
| 4.855668E+01 | -3.010200E-02 |
| 2.664003E+01 | -1.437050E-01 |
| 1.458614E+01 | -2.157890E-01 |
| 7.846900E+00 | 3.113400E-01  |
| 4.062263E+00 | 2.494780E-01  |
| 1.970383E+00 | 3.636970E-01  |
| 9.749930E-01 | -1.288652E+00 |
| 4.493950E-01 | -5.037200E-02 |
| 1.226740E-01 | 2.562387E+00  |

|      |              |               |
|------|--------------|---------------|
|      | 6.214100E-02 | -1.513281E+00 |
|      | 2.785000E-02 | -5.518040E-01 |
| S 31 | 1.00         |               |
|      | 1.755709E+09 | -1.000000E-06 |
|      | 3.405127E+08 | -3.000000E-06 |
|      | 8.319553E+07 | -7.000000E-06 |
|      | 2.435708E+07 | -1.400000E-05 |
|      | 8.193356E+06 | -2.700000E-05 |
|      | 3.058833E+06 | -4.800000E-05 |
|      | 1.232418E+06 | -8.400000E-05 |
|      | 5.242476E+05 | -1.440000E-04 |
|      | 2.315739E+05 | -2.540000E-04 |
|      | 1.049682E+05 | -4.300000E-04 |
|      | 4.844357E+04 | -7.970000E-04 |
|      | 2.266140E+04 | -1.359000E-03 |
|      | 1.072633E+04 | -2.682000E-03 |
|      | 5.138808E+03 | -4.420000E-03 |
|      | 2.496078E+03 | -8.715000E-03 |
|      | 1.232232E+03 | -1.030600E-02 |
|      | 6.197951E+02 | -1.354600E-02 |
|      | 3.182361E+02 | 1.996000E-02  |
|      | 1.669069E+02 | 4.424400E-02  |
|      | 8.930310E+01 | 1.367990E-01  |
|      | 4.855668E+01 | -1.013500E-01 |
|      | 2.664003E+01 | -1.291330E-01 |
|      | 1.458614E+01 | -5.067950E-01 |
|      | 7.846900E+00 | 7.903790E-01  |
|      | 4.062263E+00 | 3.045500E-02  |
|      | 1.970383E+00 | 1.220545E+00  |
|      | 9.749930E-01 | -4.234797E+00 |
|      | 4.493950E-01 | 3.802694E+00  |
|      | 1.226740E-01 | -4.475330E-01 |
|      | 6.214100E-02 | -2.088291E+00 |
|      | 2.785000E-02 | 1.759596E+00  |
| S 1  | 1.00         |               |
|      | 2.785000E-02 | 1.000000E+00  |
| P 28 | 1.00         |               |
|      | 2.756805E+08 | 2.500000E-06  |
|      | 4.609476E+07 | 7.100000E-06  |
|      | 9.405828E+06 | 2.140000E-05  |
|      | 2.278079E+06 | 5.670000E-05  |
|      | 6.390263E+05 | 1.434000E-04  |
|      | 2.031933E+05 | 3.510000E-04  |
|      | 7.187865E+04 | 8.545000E-04  |
|      | 2.783122E+04 | 2.096600E-03  |
|      | 1.163097E+04 | 5.210800E-03  |
|      | 5.183406E+03 | 1.304140E-02  |
|      | 2.437996E+03 | 3.214110E-02  |
|      | 1.199494E+03 | 7.506260E-02  |
|      | 6.125623E+02 | 1.551916E-01  |
|      | 3.224974E+02 | 2.615865E-01  |

|              |               |
|--------------|---------------|
| 1.739582E+02 | 3.162618E-01  |
| 9.558593E+01 | 2.279622E-01  |
| 5.320039E+01 | 8.638500E-02  |
| 2.981870E+01 | 2.841650E-02  |
| 1.672716E+01 | 1.366230E-02  |
| 9.326823E+00 | 2.819300E-03  |
| 5.129062E+00 | 5.499000E-04  |
| 2.756974E+00 | 1.161000E-04  |
| 1.433454E+00 | 3.950000E-05  |
| 7.197090E-01 | -1.190000E-05 |
| 3.503200E-01 | 3.700000E-06  |
| 1.415820E-01 | -2.100000E-06 |
| 6.064300E-02 | 9.000000E-07  |
| 2.519000E-02 | -3.000000E-07 |
| P 28 1.00    |               |
| 2.756805E+08 | -1.400000E-06 |
| 4.609476E+07 | -4.000000E-06 |
| 9.405828E+06 | -1.190000E-05 |
| 2.278079E+06 | -3.170000E-05 |
| 6.390263E+05 | -8.020000E-05 |
| 2.031933E+05 | -1.967000E-04 |
| 7.187865E+04 | -4.799000E-04 |
| 2.783122E+04 | -1.182400E-03 |
| 1.163097E+04 | -2.952400E-03 |
| 5.183406E+03 | -7.456000E-03 |
| 2.437996E+03 | -1.860440E-02 |
| 1.199494E+03 | -4.448080E-02 |
| 6.125623E+02 | -9.499680E-02 |
| 3.224974E+02 | -1.678305E-01 |
| 1.739582E+02 | -2.055356E-01 |
| 9.558593E+01 | -7.784810E-02 |
| 5.320039E+01 | 2.505311E-01  |
| 2.981870E+01 | 4.970631E-01  |
| 1.672716E+01 | 3.133613E-01  |
| 9.326823E+00 | 6.791950E-02  |
| 5.129062E+00 | 7.604200E-03  |
| 2.756974E+00 | 1.558400E-03  |
| 1.433454E+00 | 2.678000E-04  |
| 7.197090E-01 | 3.000000E-06  |
| 3.503200E-01 | 4.270000E-05  |
| 1.415820E-01 | -4.300000E-06 |
| 6.064300E-02 | 3.400000E-06  |
| 2.519000E-02 | -1.000000E-06 |
| P 28 1.00    |               |
| 2.756805E+08 | 6.000000E-07  |
| 4.609476E+07 | 1.800000E-06  |
| 9.405828E+06 | 5.400000E-06  |
| 2.278079E+06 | 1.430000E-05  |
| 6.390263E+05 | 3.620000E-05  |
| 2.031933E+05 | 8.890000E-05  |
| 7.187865E+04 | 2.171000E-04  |

|              |               |
|--------------|---------------|
| 2.783122E+04 | 5.356000E-04  |
| 1.163097E+04 | 1.339500E-03  |
| 5.183406E+03 | 3.392100E-03  |
| 2.437996E+03 | 8.500600E-03  |
| 1.199494E+03 | 2.047230E-02  |
| 6.125623E+02 | 4.420830E-02  |
| 3.224974E+02 | 7.932270E-02  |
| 1.739582E+02 | 9.762100E-02  |
| 9.558593E+01 | 2.174690E-02  |
| 5.320039E+01 | -1.916100E-01 |
| 2.981870E+01 | -4.074993E-01 |
| 1.672716E+01 | -1.679732E-01 |
| 9.326823E+00 | 3.824472E-01  |
| 5.129062E+00 | 5.737032E-01  |
| 2.756974E+00 | 2.618374E-01  |
| 1.433454E+00 | 2.529930E-02  |
| 7.197090E-01 | -5.324300E-03 |
| 3.503200E-01 | -4.618000E-03 |
| 1.415820E-01 | -4.554000E-04 |
| 6.064300E-02 | -6.480000E-05 |
| 2.519000E-02 | 9.800000E-06  |
| P 28 1.00    |               |
| 2.756805E+08 | -2.000000E-07 |
| 4.609476E+07 | -6.000000E-07 |
| 9.405828E+06 | -1.800000E-06 |
| 2.278079E+06 | -4.800000E-06 |
| 6.390263E+05 | -1.210000E-05 |
| 2.031933E+05 | -2.970000E-05 |
| 7.187865E+04 | -7.240000E-05 |
| 2.783122E+04 | -1.787000E-04 |
| 1.163097E+04 | -4.471000E-04 |
| 5.183406E+03 | -1.132400E-03 |
| 2.437996E+03 | -2.840400E-03 |
| 1.199494E+03 | -6.846900E-03 |
| 6.125623E+02 | -1.481760E-02 |
| 3.224974E+02 | -2.664600E-02 |
| 1.739582E+02 | -3.284090E-02 |
| 9.558593E+01 | -6.257400E-03 |
| 5.320039E+01 | 6.973080E-02  |
| 2.981870E+01 | 1.523824E-01  |
| 1.672716E+01 | 4.976060E-02  |
| 9.326823E+00 | -1.918262E-01 |
| 5.129062E+00 | -3.179031E-01 |
| 2.756974E+00 | -1.128710E-01 |
| 1.433454E+00 | 3.380900E-01  |
| 7.197090E-01 | 5.363084E-01  |
| 3.503200E-01 | 3.002415E-01  |
| 1.415820E-01 | 4.290370E-02  |
| 6.064300E-02 | -1.710300E-03 |
| 2.519000E-02 | 1.064000E-03  |
| P 28 1.00    |               |

|              |               |
|--------------|---------------|
| 2.756805E+08 | 5.000000E-08  |
| 4.609476E+07 | 1.600000E-07  |
| 9.405828E+06 | 4.700000E-07  |
| 2.278079E+06 | 1.260000E-06  |
| 6.390263E+05 | 3.190000E-06  |
| 2.031933E+05 | 7.840000E-06  |
| 7.187865E+04 | 1.915000E-05  |
| 2.783122E+04 | 4.722000E-05  |
| 1.163097E+04 | 1.182200E-04  |
| 5.183406E+03 | 2.992300E-04  |
| 2.437996E+03 | 7.513600E-04  |
| 1.199494E+03 | 1.809000E-03  |
| 6.125623E+02 | 3.921340E-03  |
| 3.224974E+02 | 7.038070E-03  |
| 1.739582E+02 | 8.705700E-03  |
| 9.558593E+01 | 1.594370E-03  |
| 5.320039E+01 | -1.842683E-02 |
| 2.981870E+01 | -4.071822E-02 |
| 1.672716E+01 | -1.267440E-02 |
| 9.326823E+00 | 5.131997E-02  |
| 5.129062E+00 | 8.822408E-02  |
| 2.756974E+00 | 2.819736E-02  |
| 1.433454E+00 | -1.015484E-01 |
| 7.197090E-01 | -2.037969E-01 |
| 3.503200E-01 | -1.210086E-01 |
| 1.415820E-01 | 2.847885E-01  |
| 6.064300E-02 | 5.961411E-01  |
| 2.519000E-02 | 2.845461E-01  |

P 26 1.00

|              |               |
|--------------|---------------|
| 9.405828E+06 | 1.000000E-06  |
| 2.278079E+06 | 2.000000E-06  |
| 6.390263E+05 | 5.000000E-06  |
| 2.031933E+05 | 1.100000E-05  |
| 7.187865E+04 | 2.700000E-05  |
| 2.783122E+04 | 6.800000E-05  |
| 1.163097E+04 | 1.690000E-04  |
| 5.183406E+03 | 4.290000E-04  |
| 2.437996E+03 | 1.076000E-03  |
| 1.199494E+03 | 2.590000E-03  |
| 6.125623E+02 | 5.618000E-03  |
| 3.224974E+02 | 1.007600E-02  |
| 1.739582E+02 | 1.247800E-02  |
| 9.558593E+01 | 2.262000E-03  |
| 5.320039E+01 | -2.633900E-02 |
| 2.981870E+01 | -5.844100E-02 |
| 1.672716E+01 | -1.799600E-02 |
| 9.326823E+00 | 7.316900E-02  |
| 5.129062E+00 | 1.275380E-01  |
| 2.756974E+00 | 3.907100E-02  |
| 1.433454E+00 | -1.435790E-01 |
| 7.197090E-01 | -3.050420E-01 |

|      |              |               |
|------|--------------|---------------|
|      | 3.503200E-01 | -1.787740E-01 |
|      | 1.415820E-01 | 6.480570E-01  |
|      | 6.064300E-02 | 5.242010E-01  |
|      | 2.519000E-02 | 2.004900E-02  |
| P 26 | 1.00         |               |
|      | 9.405828E+06 | 1.000000E-06  |
|      | 2.278079E+06 | 3.000000E-06  |
|      | 6.390263E+05 | 8.000000E-06  |
|      | 2.031933E+05 | 1.900000E-05  |
|      | 7.187865E+04 | 4.600000E-05  |
|      | 2.783122E+04 | 1.130000E-04  |
|      | 1.163097E+04 | 2.890000E-04  |
|      | 5.183406E+03 | 7.090000E-04  |
|      | 2.437996E+03 | 1.849000E-03  |
|      | 1.199494E+03 | 4.255000E-03  |
|      | 6.125623E+02 | 9.737000E-03  |
|      | 3.224974E+02 | 1.626600E-02  |
|      | 1.739582E+02 | 2.266200E-02  |
|      | 9.558593E+01 | 1.790000E-04  |
|      | 5.320039E+01 | -3.690400E-02 |
|      | 2.981870E+01 | -1.137880E-01 |
|      | 1.672716E+01 | -5.035000E-03 |
|      | 9.326823E+00 | 8.338200E-02  |
|      | 5.129062E+00 | 2.968810E-01  |
|      | 2.756974E+00 | -4.371200E-02 |
|      | 1.433454E+00 | -1.017150E-01 |
|      | 7.197090E-01 | -1.205985E+00 |
|      | 3.503200E-01 | 1.173144E+00  |
|      | 1.415820E-01 | 8.868500E-01  |
|      | 6.064300E-02 | -1.199702E+00 |
|      | 2.519000E-02 | -2.668200E-02 |
| P 1  | 1.00         |               |
|      | 2.519000E-02 | 1.000000E+00  |
| D 19 | 1.00         |               |
|      | 3.337742E+04 | 2.810000E-05  |
|      | 9.004266E+03 | 1.805000E-04  |
|      | 3.049558E+03 | 1.035100E-03  |
|      | 1.228148E+03 | 4.789100E-03  |
|      | 5.621297E+02 | 1.789980E-02  |
|      | 2.817336E+02 | 5.290040E-02  |
|      | 1.500302E+02 | 1.266245E-01  |
|      | 8.287758E+01 | 2.344967E-01  |
|      | 4.660527E+01 | 3.255258E-01  |
|      | 2.629149E+01 | 2.925701E-01  |
|      | 1.471036E+01 | 1.356091E-01  |
|      | 8.088891E+00 | 2.813650E-02  |
|      | 4.337181E+00 | 3.878700E-03  |
|      | 2.250717E+00 | 1.371100E-03  |
|      | 1.090234E+00 | 1.844000E-04  |
|      | 4.993750E-01 | 3.290000E-05  |
|      | 2.180060E-01 | -7.100000E-06 |

|      |              |               |
|------|--------------|---------------|
|      | 9.104400E-02 | 2.800000E-06  |
|      | 3.572800E-02 | -1.100000E-06 |
| D 19 | 1.00         |               |
|      | 3.337742E+04 | -1.400000E-05 |
|      | 9.004266E+03 | -8.970000E-05 |
|      | 3.049558E+03 | -5.168000E-04 |
|      | 1.228148E+03 | -2.395400E-03 |
|      | 5.621297E+02 | -9.040300E-03 |
|      | 2.817336E+02 | -2.693470E-02 |
|      | 1.500302E+02 | -6.581350E-02 |
|      | 8.287758E+01 | -1.214854E-01 |
|      | 4.660527E+01 | -1.629359E-01 |
|      | 2.629149E+01 | -9.309150E-02 |
|      | 1.471036E+01 | 1.551805E-01  |
|      | 8.088891E+00 | 3.946828E-01  |
|      | 4.337181E+00 | 3.967364E-01  |
|      | 2.250717E+00 | 1.851120E-01  |
|      | 1.090234E+00 | 3.168260E-02  |
|      | 4.993750E-01 | 9.961000E-04  |
|      | 2.180060E-01 | 3.768000E-04  |
|      | 9.104400E-02 | -9.930000E-05 |
|      | 3.572800E-02 | 3.790000E-05  |
| D 19 | 1.00         |               |
|      | 3.337742E+04 | 2.800000E-06  |
|      | 9.004266E+03 | 1.790000E-05  |
|      | 3.049558E+03 | 1.033000E-04  |
|      | 1.228148E+03 | 4.791000E-04  |
|      | 5.621297E+02 | 1.809600E-03  |
|      | 2.817336E+02 | 5.402700E-03  |
|      | 1.500302E+02 | 1.323220E-02  |
|      | 8.287758E+01 | 2.443540E-02  |
|      | 4.660527E+01 | 3.255810E-02  |
|      | 2.629149E+01 | 1.630290E-02  |
|      | 1.471036E+01 | -4.083290E-02 |
|      | 8.088891E+00 | -9.443950E-02 |
|      | 4.337181E+00 | -9.211620E-02 |
|      | 2.250717E+00 | 1.390530E-02  |
|      | 1.090234E+00 | 1.951061E-01  |
|      | 4.993750E-01 | 3.477603E-01  |
|      | 2.180060E-01 | 3.846470E-01  |
|      | 9.104400E-02 | 2.655230E-01  |
|      | 3.572800E-02 | 6.451070E-02  |
| D 19 | 1.00         |               |
|      | 3.337742E+04 | -3.000000E-06 |
|      | 9.004266E+03 | -2.000000E-05 |
|      | 3.049558E+03 | -1.130000E-04 |
|      | 1.228148E+03 | -5.260000E-04 |
|      | 5.621297E+02 | -1.984000E-03 |
|      | 2.817336E+02 | -5.932000E-03 |
|      | 1.500302E+02 | -1.451500E-02 |
|      | 8.287758E+01 | -2.684400E-02 |

|      |              |               |
|------|--------------|---------------|
|      | 4.660527E+01 | -3.563000E-02 |
|      | 2.629149E+01 | -1.757600E-02 |
|      | 1.471036E+01 | 4.632900E-02  |
|      | 8.088891E+00 | 1.050870E-01  |
|      | 4.337181E+00 | 1.010330E-01  |
|      | 2.250717E+00 | -2.680200E-02 |
|      | 1.090234E+00 | -2.588300E-01 |
|      | 4.993750E-01 | -4.612510E-01 |
|      | 2.180060E-01 | -3.332500E-02 |
|      | 9.104400E-02 | 6.313280E-01  |
|      | 3.572800E-02 | 3.279370E-01  |
| D 19 | 1.00         |               |
|      | 3.337742E+04 | 4.000000E-06  |
|      | 9.004266E+03 | 2.500000E-05  |
|      | 3.049558E+03 | 1.470000E-04  |
|      | 1.228148E+03 | 6.620000E-04  |
|      | 5.621297E+02 | 2.582000E-03  |
|      | 2.817336E+02 | 7.456000E-03  |
|      | 1.500302E+02 | 1.899100E-02  |
|      | 8.287758E+01 | 3.344100E-02  |
|      | 4.660527E+01 | 4.747200E-02  |
|      | 2.629149E+01 | 1.761800E-02  |
|      | 1.471036E+01 | -5.598200E-02 |
|      | 8.088891E+00 | -1.491330E-01 |
|      | 4.337181E+00 | -1.084140E-01 |
|      | 2.250717E+00 | 3.052500E-02  |
|      | 1.090234E+00 | 5.360480E-01  |
|      | 4.993750E-01 | 3.680330E-01  |
|      | 2.180060E-01 | -1.074801E+00 |
|      | 9.104400E-02 | 7.835400E-02  |
|      | 3.572800E-02 | 7.010640E-01  |
| D 1  | 1.00         |               |
|      | 3.572800E-02 | 1.000000E+00  |
| F 11 | 1.00         |               |
|      | 6.712408E+02 | 3.759000E-04  |
|      | 2.348865E+02 | 3.294400E-03  |
|      | 1.006506E+02 | 1.740650E-02  |
|      | 4.839611E+01 | 5.677050E-02  |
|      | 2.463601E+01 | 1.388145E-01  |
|      | 1.279909E+01 | 2.433081E-01  |
|      | 6.633614E+00 | 3.059279E-01  |
|      | 3.373708E+00 | 2.948321E-01  |
|      | 1.653725E+00 | 2.145462E-01  |
|      | 7.604970E-01 | 1.086476E-01  |
|      | 3.140770E-01 | 2.756450E-02  |
| F 1  | 1.00         |               |
|      | 5.588000E-01 | 1.000000E+00  |
| F 1  | 1.00         |               |
|      | 1.597000E-01 | 1.000000E+00  |
| S 1  | 1.00         |               |
|      | 1.250000E-02 | 1.000000E+00  |



P 1 1.00  
1.050000E-02 1.000000E+00  
D 1 1.00  
1.400000E-02 1.000000E+00  
F 1 1.00  
5.050000E-02 1.000000E+00  
\*\*\*\*

Mo 0  
S 26 1.00  
1.622270E+08 4.300000E-05  
2.568810E+07 1.130000E-04  
5.428430E+06 3.120000E-04  
1.432080E+06 7.130000E-04  
4.465710E+05 1.532000E-03  
1.575650E+05 3.131000E-03  
6.080040E+04 6.349000E-03  
2.501180E+04 1.295700E-02  
1.077100E+04 2.695900E-02  
4.796840E+03 5.657100E-02  
2.193200E+03 1.154950E-01  
1.025760E+03 2.118170E-01  
4.901640E+02 3.050670E-01  
2.393290E+02 2.726880E-01  
1.194130E+02 1.085990E-01  
6.081930E+01 3.119300E-02  
3.151130E+01 3.375500E-02  
1.649190E+01 1.447600E-02  
8.616140E+00 6.679000E-03  
4.414150E+00 6.892000E-03  
2.162700E+00 1.728000E-03  
1.046100E+00 -5.300000E-05  
4.762780E-01 1.200000E-05  
1.268570E-01 -1.000000E-05  
6.386100E-02 6.000000E-06  
2.810700E-02 -2.000000E-06

S 26 1.00  
1.622270E+08 -1.700000E-05  
2.568810E+07 -4.600000E-05  
5.428430E+06 -1.270000E-04  
1.432080E+06 -2.900000E-04  
4.465710E+05 -6.250000E-04  
1.575650E+05 -1.280000E-03  
6.080040E+04 -2.609000E-03  
2.501180E+04 -5.363000E-03  
1.077100E+04 -1.130700E-02  
4.796840E+03 -2.425500E-02  
2.193200E+03 -5.171200E-02  
1.025760E+03 -1.029860E-01  
4.901640E+02 -1.749000E-01  
2.393290E+02 -2.038080E-01

|              |               |
|--------------|---------------|
| 1.194130E+02 | -5.247400E-02 |
| 6.081930E+01 | 3.315870E-01  |
| 3.151130E+01 | 5.329750E-01  |
| 1.649190E+01 | 2.456630E-01  |
| 8.616140E+00 | 4.181600E-02  |
| 4.414150E+00 | 2.054100E-02  |
| 2.162700E+00 | 4.537000E-03  |
| 1.046100E+00 | -2.940000E-04 |
| 4.762780E-01 | -1.050000E-04 |
| 1.268570E-01 | -2.500000E-05 |
| 6.386100E-02 | 1.200000E-05  |
| 2.810700E-02 | -4.000000E-06 |
| S 26 1.00    |               |
| 1.622270E+08 | 6.000000E-06  |
| 2.568810E+07 | 1.600000E-05  |
| 5.428430E+06 | 4.500000E-05  |
| 1.432080E+06 | 1.040000E-04  |
| 4.465710E+05 | 2.230000E-04  |
| 1.575650E+05 | 4.580000E-04  |
| 6.080040E+04 | 9.350000E-04  |
| 2.501180E+04 | 1.926000E-03  |
| 1.077100E+04 | 4.090000E-03  |
| 4.796840E+03 | 8.838000E-03  |
| 2.193200E+03 | 1.922200E-02  |
| 1.025760E+03 | 3.941100E-02  |
| 4.901640E+02 | 7.130800E-02  |
| 2.393290E+02 | 8.999600E-02  |
| 1.194130E+02 | 2.297700E-02  |
| 6.081930E+01 | -2.304730E-01 |
| 3.151130E+01 | -5.003740E-01 |
| 1.649190E+01 | -2.664810E-01 |
| 8.616140E+00 | 4.671500E-01  |
| 4.414150E+00 | 7.226830E-01  |
| 2.162700E+00 | 1.735690E-01  |
| 1.046100E+00 | 1.823000E-03  |
| 4.762780E-01 | 2.556000E-03  |
| 1.268570E-01 | -3.390000E-04 |
| 6.386100E-02 | 2.540000E-04  |
| 2.810700E-02 | -7.400000E-05 |
| S 26 1.00    |               |
| 1.622270E+08 | -2.000000E-06 |
| 2.568810E+07 | -6.000000E-06 |
| 5.428430E+06 | -1.800000E-05 |
| 1.432080E+06 | -4.000000E-05 |
| 4.465710E+05 | -8.700000E-05 |
| 1.575650E+05 | -1.780000E-04 |
| 6.080040E+04 | -3.640000E-04 |
| 2.501180E+04 | -7.510000E-04 |
| 1.077100E+04 | -1.592000E-03 |
| 4.796840E+03 | -3.444000E-03 |
| 2.193200E+03 | -7.469000E-03 |

|              |               |
|--------------|---------------|
| 1.025760E+03 | -1.532400E-02 |
| 4.901640E+02 | -2.760100E-02 |
| 2.393290E+02 | -3.508300E-02 |
| 1.194130E+02 | -8.845000E-03 |
| 6.081930E+01 | 9.350100E-02  |
| 3.151130E+01 | 2.216680E-01  |
| 1.649190E+01 | 1.190100E-01  |
| 8.616140E+00 | -2.618900E-01 |
| 4.414150E+00 | -6.954170E-01 |
| 2.162700E+00 | -1.131260E-01 |
| 1.046100E+00 | 7.962080E-01  |
| 4.762780E-01 | 5.331810E-01  |
| 1.268570E-01 | 3.875200E-02  |
| 6.386100E-02 | -1.374600E-02 |
| 2.810700E-02 | 3.949000E-03  |
| S 26 1.00    |               |
| 1.622270E+08 | 1.000000E-06  |
| 2.568810E+07 | 2.000000E-06  |
| 5.428430E+06 | 5.000000E-06  |
| 1.432080E+06 | 1.100000E-05  |
| 4.465710E+05 | 2.400000E-05  |
| 1.575650E+05 | 4.900000E-05  |
| 6.080040E+04 | 9.900000E-05  |
| 2.501180E+04 | 2.050000E-04  |
| 1.077100E+04 | 4.350000E-04  |
| 4.796840E+03 | 9.410000E-04  |
| 2.193200E+03 | 2.039000E-03  |
| 1.025760E+03 | 4.189000E-03  |
| 4.901640E+02 | 7.544000E-03  |
| 2.393290E+02 | 9.613000E-03  |
| 1.194130E+02 | 2.413000E-03  |
| 6.081930E+01 | -2.582500E-02 |
| 3.151130E+01 | -6.192600E-02 |
| 1.649190E+01 | -3.345500E-02 |
| 8.616140E+00 | 7.589800E-02  |
| 4.414150E+00 | 2.199000E-01  |
| 2.162700E+00 | 2.977500E-02  |
| 1.046100E+00 | -3.303870E-01 |
| 4.762780E-01 | -3.598590E-01 |
| 1.268570E-01 | 2.478020E-01  |
| 6.386100E-02 | 6.410330E-01  |
| 2.810700E-02 | 3.071470E-01  |
| S 26 1.00    |               |
| 1.622270E+08 | 1.000000E-06  |
| 2.568810E+07 | 3.000000E-06  |
| 5.428430E+06 | 9.000000E-06  |
| 1.432080E+06 | 2.100000E-05  |
| 4.465710E+05 | 4.500000E-05  |
| 1.575650E+05 | 9.100000E-05  |
| 6.080040E+04 | 1.890000E-04  |
| 2.501180E+04 | 3.780000E-04  |

|      |              |               |
|------|--------------|---------------|
|      | 1.077100E+04 | 8.380000E-04  |
|      | 4.796840E+03 | 1.709000E-03  |
|      | 2.193200E+03 | 3.990000E-03  |
|      | 1.025760E+03 | 7.466000E-03  |
|      | 4.901640E+02 | 1.522600E-02  |
|      | 2.393290E+02 | 1.551200E-02  |
|      | 1.194130E+02 | 1.078600E-02  |
|      | 6.081930E+01 | -6.327300E-02 |
|      | 3.151130E+01 | -8.715200E-02 |
|      | 1.649190E+01 | -1.252170E-01 |
|      | 8.616140E+00 | 2.657180E-01  |
|      | 4.414150E+00 | 2.413300E-01  |
|      | 2.162700E+00 | 4.142440E-01  |
|      | 1.046100E+00 | -1.549714E+00 |
|      | 4.762780E-01 | 2.795180E-01  |
|      | 1.268570E-01 | 2.319320E+00  |
|      | 6.386100E-02 | -1.439215E+00 |
|      | 2.810700E-02 | -5.052960E-01 |
| S 26 | 1.00         |               |
|      | 1.622270E+08 | 2.000000E-06  |
|      | 2.568810E+07 | 5.000000E-06  |
|      | 5.428430E+06 | 1.400000E-05  |
|      | 1.432080E+06 | 3.200000E-05  |
|      | 4.465710E+05 | 6.900000E-05  |
|      | 1.575650E+05 | 1.400000E-04  |
|      | 6.080040E+04 | 2.920000E-04  |
|      | 2.501180E+04 | 5.780000E-04  |
|      | 1.077100E+04 | 1.301000E-03  |
|      | 4.796840E+03 | 2.600000E-03  |
|      | 2.193200E+03 | 6.227000E-03  |
|      | 1.025760E+03 | 1.129000E-02  |
|      | 4.901640E+02 | 2.402200E-02  |
|      | 2.393290E+02 | 2.266500E-02  |
|      | 1.194130E+02 | 1.987900E-02  |
|      | 6.081930E+01 | -1.063440E-01 |
|      | 3.151130E+01 | -1.260250E-01 |
|      | 1.649190E+01 | -2.195240E-01 |
|      | 8.616140E+00 | 4.965450E-01  |
|      | 4.414150E+00 | 3.930060E-01  |
|      | 2.162700E+00 | 5.776010E-01  |
|      | 1.046100E+00 | -3.754026E+00 |
|      | 4.762780E-01 | 3.863439E+00  |
|      | 1.268570E-01 | -1.220996E+00 |
|      | 6.386100E-02 | -1.145399E+00 |
|      | 2.810700E-02 | 1.400924E+00  |
| S 1  | 1.00         |               |
|      | 2.810700E-02 | 1.000000E+00  |
| P 21 | 1.00         |               |
|      | 1.206380E+06 | 1.500000E-05  |
|      | 2.000840E+05 | 5.500000E-05  |
|      | 4.528180E+04 | 2.070000E-04  |

|              |               |
|--------------|---------------|
| 1.301010E+04 | 7.480000E-04  |
| 4.474990E+03 | 2.655000E-03  |
| 1.758500E+03 | 9.006000E-03  |
| 7.612450E+02 | 2.803200E-02  |
| 3.531500E+02 | 7.710400E-02  |
| 1.720400E+02 | 1.752570E-01  |
| 8.673700E+01 | 3.039310E-01  |
| 4.478870E+01 | 3.475700E-01  |
| 2.350440E+01 | 2.025980E-01  |
| 1.245200E+01 | 4.259100E-02  |
| 6.612050E+00 | -2.898000E-03 |
| 3.487030E+00 | -3.677000E-03 |
| 1.803300E+00 | -5.880000E-04 |
| 8.939430E-01 | 1.800000E-05  |
| 4.285930E-01 | 7.000000E-05  |
| 1.701960E-01 | 2.000000E-06  |
| 7.166500E-02 | 2.000000E-06  |
| 2.923900E-02 | -1.000000E-06 |
| P 21 1.00    |               |
| 1.206380E+06 | -6.000000E-06 |
| 2.000840E+05 | -2.300000E-05 |
| 4.528180E+04 | -8.700000E-05 |
| 1.301010E+04 | -3.160000E-04 |
| 4.474990E+03 | -1.126000E-03 |
| 1.758500E+03 | -3.844000E-03 |
| 7.612450E+02 | -1.212500E-02 |
| 3.531500E+02 | -3.418300E-02 |
| 1.720400E+02 | -8.089600E-02 |
| 8.673700E+01 | -1.480080E-01 |
| 4.478870E+01 | -1.740180E-01 |
| 2.350440E+01 | -1.699700E-02 |
| 1.245200E+01 | 2.938150E-01  |
| 6.612050E+00 | 4.869490E-01  |
| 3.487030E+00 | 2.947520E-01  |
| 1.803300E+00 | 4.736300E-02  |
| 8.939430E-01 | -3.780000E-04 |
| 4.285930E-01 | -2.364000E-03 |
| 1.701960E-01 | -1.630000E-04 |
| 7.166500E-02 | -6.300000E-05 |
| 2.923900E-02 | 1.500000E-05  |
| P 21 1.00    |               |
| 1.206380E+06 | 2.000000E-06  |
| 2.000840E+05 | 8.000000E-06  |
| 4.528180E+04 | 3.200000E-05  |
| 1.301010E+04 | 1.160000E-04  |
| 4.474990E+03 | 4.140000E-04  |
| 1.758500E+03 | 1.413000E-03  |
| 7.612450E+02 | 4.467000E-03  |
| 3.531500E+02 | 1.262800E-02  |
| 1.720400E+02 | 3.007200E-02  |
| 8.673700E+01 | 5.543900E-02  |

|              |               |
|--------------|---------------|
| 4.478870E+01 | 6.560200E-02  |
| 2.350440E+01 | -1.462000E-03 |
| 1.245200E+01 | -1.396540E-01 |
| 6.612050E+00 | -2.601410E-01 |
| 3.487030E+00 | -1.484840E-01 |
| 1.803300E+00 | 2.907740E-01  |
| 8.939430E-01 | 5.350980E-01  |
| 4.285930E-01 | 3.336620E-01  |
| 1.701960E-01 | 5.381200E-02  |
| 7.166500E-02 | -3.376000E-03 |
| 2.923900E-02 | 1.522000E-03  |
| P 21 1.00    |               |
| 1.206380E+06 | 1.000000E-06  |
| 2.000840E+05 | 2.000000E-06  |
| 4.528180E+04 | 9.000000E-06  |
| 1.301010E+04 | 3.200000E-05  |
| 4.474990E+03 | 1.130000E-04  |
| 1.758500E+03 | 3.870000E-04  |
| 7.612450E+02 | 1.226000E-03  |
| 3.531500E+02 | 3.459000E-03  |
| 1.720400E+02 | 8.270000E-03  |
| 8.673700E+01 | 1.519500E-02  |
| 4.478870E+01 | 1.814100E-02  |
| 2.350440E+01 | -8.960000E-04 |
| 1.245200E+01 | -3.903700E-02 |
| 6.612050E+00 | -7.572100E-02 |
| 3.487030E+00 | -3.972000E-02 |
| 1.803300E+00 | 9.760100E-02  |
| 8.939430E-01 | 2.133040E-01  |
| 4.285930E-01 | 1.173450E-01  |
| 1.701960E-01 | -2.870540E-01 |
| 7.166500E-02 | -5.891390E-01 |
| 2.923900E-02 | -2.888420E-01 |
| P 21 1.00    |               |
| 1.206380E+06 | -1.000000E-06 |
| 2.000840E+05 | -4.000000E-06 |
| 4.528180E+04 | -1.400000E-05 |
| 1.301010E+04 | -4.900000E-05 |
| 4.474990E+03 | -1.750000E-04 |
| 1.758500E+03 | -5.950000E-04 |
| 7.612450E+02 | -1.895000E-03 |
| 3.531500E+02 | -5.319000E-03 |
| 1.720400E+02 | -1.278500E-02 |
| 8.673700E+01 | -2.333600E-02 |
| 4.478870E+01 | -2.820800E-02 |
| 2.350440E+01 | 1.882000E-03  |
| 1.245200E+01 | 5.916500E-02  |
| 6.612050E+00 | 1.192730E-01  |
| 3.487030E+00 | 5.892000E-02  |
| 1.803300E+00 | -1.483110E-01 |
| 8.939430E-01 | -3.626210E-01 |

|      |              |               |
|------|--------------|---------------|
|      | 4.285930E-01 | -1.214220E-01 |
|      | 1.701960E-01 | 6.465160E-01  |
|      | 7.166500E-02 | 4.914620E-01  |
|      | 2.923900E-02 | 2.922700E-02  |
| P 21 | 1.00         |               |
|      | 1.206380E+06 | -2.000000E-06 |
|      | 2.000840E+05 | -6.000000E-06 |
|      | 4.528180E+04 | -2.200000E-05 |
|      | 1.301010E+04 | -7.800000E-05 |
|      | 4.474990E+03 | -2.890000E-04 |
|      | 1.758500E+03 | -9.480000E-04 |
|      | 7.612450E+02 | -3.137000E-03 |
|      | 3.531500E+02 | -8.432000E-03 |
|      | 1.720400E+02 | -2.132800E-02 |
|      | 8.673700E+01 | -3.646100E-02 |
|      | 4.478870E+01 | -4.958900E-02 |
|      | 2.350440E+01 | 1.156700E-02  |
|      | 1.245200E+01 | 8.328400E-02  |
|      | 6.612050E+00 | 2.325200E-01  |
|      | 3.487030E+00 | 5.001700E-02  |
|      | 1.803300E+00 | -2.401780E-01 |
|      | 8.939430E-01 | -1.032742E+00 |
|      | 4.285930E-01 | 1.066644E+00  |
|      | 1.701960E-01 | 8.318460E-01  |
|      | 7.166500E-02 | -1.122290E+00 |
|      | 2.923900E-02 | -8.228100E-02 |
| P 1  | 1.00         |               |
|      | 2.923900E-02 | 1.000000E+00  |
| D 14 | 1.00         |               |
|      | 2.176180E+03 | 1.630000E-04  |
|      | 6.237920E+02 | 1.445000E-03  |
|      | 2.317980E+02 | 8.628000E-03  |
|      | 1.005040E+02 | 3.440300E-02  |
|      | 4.750650E+01 | 1.016110E-01  |
|      | 2.351030E+01 | 2.202730E-01  |
|      | 1.190780E+01 | 3.299860E-01  |
|      | 6.082020E+00 | 3.348450E-01  |
|      | 3.080710E+00 | 1.856540E-01  |
|      | 1.485250E+00 | 3.933800E-02  |
|      | 6.892400E-01 | 1.410000E-03  |
|      | 3.073880E-01 | 4.510000E-04  |
|      | 1.305320E-01 | -9.900000E-05 |
|      | 5.124600E-02 | 4.500000E-05  |
| D 14 | 1.00         |               |
|      | 2.176180E+03 | -4.200000E-05 |
|      | 6.237920E+02 | -3.760000E-04 |
|      | 2.317980E+02 | -2.246000E-03 |
|      | 1.005040E+02 | -9.032000E-03 |
|      | 4.750650E+01 | -2.688000E-02 |
|      | 2.351030E+01 | -5.884600E-02 |
|      | 1.190780E+01 | -8.479100E-02 |

|      |              |               |
|------|--------------|---------------|
|      | 6.082020E+00 | -7.842000E-02 |
|      | 3.080710E+00 | 2.572800E-02  |
|      | 1.485250E+00 | 2.293670E-01  |
|      | 6.892400E-01 | 3.725650E-01  |
|      | 3.073880E-01 | 3.577360E-01  |
|      | 1.305320E-01 | 2.187660E-01  |
|      | 5.124600E-02 | 5.978700E-02  |
| D 14 | 1.00         |               |
|      | 2.176180E+03 | 4.300000E-05  |
|      | 6.237920E+02 | 3.800000E-04  |
|      | 2.317980E+02 | 2.285000E-03  |
|      | 1.005040E+02 | 9.154000E-03  |
|      | 4.750650E+01 | 2.745300E-02  |
|      | 2.351030E+01 | 5.986300E-02  |
|      | 1.190780E+01 | 8.570700E-02  |
|      | 6.082020E+00 | 7.306700E-02  |
|      | 3.080710E+00 | -4.214800E-02 |
|      | 1.485250E+00 | -2.892500E-01 |
|      | 6.892400E-01 | -3.951860E-01 |
|      | 3.073880E-01 | 5.206100E-02  |
|      | 1.305320E-01 | 5.781250E-01  |
|      | 5.124600E-02 | 3.712160E-01  |
| D 14 | 1.00         |               |
|      | 2.176180E+03 | -6.400000E-05 |
|      | 6.237920E+02 | -5.580000E-04 |
|      | 2.317980E+02 | -3.385000E-03 |
|      | 1.005040E+02 | -1.348500E-02 |
|      | 4.750650E+01 | -4.102600E-02 |
|      | 2.351030E+01 | -8.856200E-02 |
|      | 1.190780E+01 | -1.236640E-01 |
|      | 6.082020E+00 | -8.781100E-02 |
|      | 3.080710E+00 | 1.169900E-01  |
|      | 1.485250E+00 | 5.726770E-01  |
|      | 6.892400E-01 | 1.386100E-01  |
|      | 3.073880E-01 | -9.149480E-01 |
|      | 1.305320E-01 | 6.012000E-03  |
|      | 5.124600E-02 | 7.291860E-01  |
| D 1  | 1.00         |               |
|      | 5.124600E-02 | 1.000000E+00  |
| F 1  | 1.00         |               |
|      | 1.115600E+00 | 1.000000E+00  |
| F 1  | 1.00         |               |
|      | 3.136000E-01 | 1.000000E+00  |
| S 1  | 1.00         |               |
|      | 1.240000E-02 | 1.000000E+00  |
| P 1  | 1.00         |               |
|      | 1.190000E-02 | 1.000000E+00  |
| D 1  | 1.00         |               |
|      | 2.010000E-02 | 1.000000E+00  |
| F 1  | 1.00         |               |
|      | 1.190000E-01 | 1.000000E+00  |



\* \* \* \*
